# 1 **Replication timing maintains the global epigenetic state in human cells.**

2

3 Kyle N. Klein<sup>1, #</sup>, Peiyao A. Zhao<sup>1, #</sup>, Xiaowen Lyu<sup>2, #</sup>, Daniel A. Bartlett<sup>1</sup>, Amar Singh<sup>3</sup>, Ipek Tasan<sup>4</sup>,  
4 Lotte P. Watts<sup>5</sup>, Shin-ichiro Hiraga<sup>6</sup>, Toyoaki Natsume<sup>6</sup>, Xuemeng Zhou<sup>7</sup>, Danny Leung<sup>7</sup>, Masato  
5 T. Kanemaki<sup>6</sup>, Anne D. Donaldson<sup>5</sup>, Huimin Zhao<sup>4</sup>, Stephen Dalton<sup>3</sup>, Victor G. Corces<sup>2</sup>, David M.  
6 Gilbert<sup>1\*</sup>.

7

8 <sup>1</sup>Department of Biological Science, 319 Stadium Drive, Florida State University, Tallahassee, FL  
9 32306, USA.

10 <sup>2</sup>Department of Human Genetics, Emory University School of Medicine, Atlanta, GA 30322, USA

11 <sup>3</sup>Department of Biochemistry and Molecular Biology, University of Georgia, Athens, GA 30602,  
12 USA.

13 <sup>4</sup>Department of Biochemistry, University of Illinois at Urbana-Champaign, Urbana, IL 61801,  
14 USA.

15 <sup>5</sup>Institute of Medical Sciences, University of Aberdeen, Aberdeen, AB25 2ZD, UK.

16 <sup>6</sup>Department of Chromosome Science, National Institute of Genetics, Research Organization of  
17 Information and Systems (ROIS), Yata 1111, Mishima, Shizuoka 411-8540, Japan. Department  
18 of Genetics, The Graduate University for Advanced Studies (SOKENDAI), Yata 1111, Mishima,  
19 Shizuoka 411-8540, Japan

20 <sup>7</sup>Division of Life Science, Hong Kong University of Science and Technology, Clear Water Bay,  
21 Hong Kong, China

22 # These authors contributed equally

23 \*Correspondence to: [gilbert@bio.fsu.edu](mailto:gilbert@bio.fsu.edu)

24

## 25 **Abstract:**

26

27 DNA is replicated in a defined temporal order termed the replication timing (RT) program. RT is  
28 spatially segregated in the nucleus with early/late replication corresponding to Hi-C A/B  
29 chromatin compartments, respectively. Early replication is also associated with active histone  
30 modifications and transcriptional permissiveness. However, the mechanistic interplay between  
31 RT, chromatin state, and genome compartmentalization is largely unknown. Here we report that  
32 RT is central to epigenome maintenance and compartmentalization in both human embryonic  
33 stem cells (hESCs) and cancer cell line HCT116. Knockout (KO) of the conserved RT control  
34 factor RIF1, rather than causing discrete RT switches as previously suspected, lead to

35 dramatically increased cell to cell heterogeneity of RT genome wide, despite RIF1's enrichment  
36 in late replicating chromatin. RIF1 KO hESCs have a nearly random RT program, unlike all prior  
37 RIF1 KO cells, including HCT116, which show localized alterations. Regions that retain RT,  
38 which are prevalent in HCT116 but rare in hESCs, consist of large H3K9me3 domains revealing  
39 two independent mechanisms of RT regulation that are used to different extents in different cell  
40 types. RIF1 KO results in a striking genome wide downregulation of H3K27ac peaks and  
41 enrichment of H3K9me3 at large domains that remain late replicating, while H3K27me3 and  
42 H3K4me3 are re-distributed genome wide in a cell type specific manner. These histone  
43 modification changes coincided with global reorganization of genome compartments,  
44 transcription changes and a genome wide strengthening of TAD structures. Inducible  
45 degradation of RIF1 revealed that disruption of RT is upstream of genome compartmentalization  
46 changes. Our findings demonstrate that disruption of RT leads to widespread epigenetic mis-  
47 regulation, supporting previously speculative models in which the timing of chromatin assembly  
48 at the replication fork plays a key role in maintaining the global epigenetic state, which in turn  
49 drives genome architecture.

50

51 **Main Text:**

52

53 DNA is replicated during S phase of the cell cycle in a temporal order known as the replication  
54 timing (RT) program. RT is conserved among eukaryotes, cell type specific and correlates with  
55 many important epigenomic features (1). Early replicating chromatin has euchromatic  
56 characteristics such as active histone modifications and location in the nuclear interior while late  
57 replicating chromatin is associated with heterochromatic features like transcriptionally  
58 repressive histone modifications and location at the nuclear periphery. Early and late replicating  
59 chromatin correspond to A- and B-compartments respectively as defined by high throughput  
60 chromatin conformation capture (Hi-C) (2). Despite these close correlations, the mechanistic link  
61 between RT and the accurate maintenance of chromatin through cell cycles remains elusive.  
62 Prior work has shown that histones and their modifications are both recycled from parental  
63 chromatin and added and modified de novo after passage of the replication fork with different  
64 chromatin states showing differing dynamics of reassembly (3, 4). It has long been  
65 hypothesized that RT influences chromatin maintenance. Indeed, microinjection of plasmids into  
66 mammalian nuclei revealed that plasmids replicated in early S phase were decorated with  
67 acetylated histones, while those replicated later in S phase were devoid of acetylated histones  
68 (5). However, there is still no direct evidence implicating RT in epigenetic state maintenance,

69 largely due to the inability to manipulate genome wide RT. Recently the conserved protein RIF1  
70 has been shown to affect RT in many eukaryotes, however, partly because the effects have  
71 been partial or localized, RIF1 disruption has not been exploited to study the effects of RT  
72 abrogation (6–11).

73

74 To gain insight into the role of genome wide RT as controlled by RIF1 in shaping the epigenome  
75 we examined the effects of RIF1 knock out (KO) in three human cell lines. H9 hESC, HCT116,  
76 established by removal of RIF1 exon 3 (Fig. S1a, b, c). As previously reported (11), RIF1 KO  
77 cells proceeded through the cell cycle with minor decreases in the number of S phase cells and  
78 increases in the number of gap phase cells (Fig S1d, e). All three RIF1 KO cell lines exhibit  
79 genome wide aberrations in RT measured using E/L Repli-seq (12) but with varying degrees of  
80 severity (Fig. 1a). Similar to all prior reports in mammalian cells (8, 9, 11), discrete domains  
81 changed RT either from early to late (EtL) or late to early (LtE) in E/L RT profiles of HCT116 and  
82 HAP1 cells. RIF1 KO caused 43% of the genome to change RT (23% EtL and 20% LtE) in  
83 HCT116 and HAP1 cells. However, in H9 hESCs (Fig. 1a), nearly the entire genome acquired a  
84 log<sub>2</sub>E/L dynamic range close to zero (Fig 1b), precluding identification of specific domain level  
85 RT changes and suggesting that RIF1 is necessary for nearly all temporal control of replication  
86 in hESCs. This near complete loss of RT control in RIF1 KO hESCs was much more severe  
87 than we previously reported in RIF1 KO mouse ESCs (11) (Fig S1f). Moreover, partial  
88 knockdown (KD) of RIF1 in H9 hESCs using an shRNA (Fig S2a) resulted in a partial effect on  
89 the RT program (Fig S2b), demonstrating that RIF1's control of global RT in hESCs is dosage  
90 dependent. Plotting the density of RT values as a histogram confirmed that all three RIF1 KO  
91 cell lines, as well as RIF1 KD H9 hESCs, show genome wide RT values accumulating near the  
92 middle of S phase for most genomic bins (Fig 1b, Fig S2c) and that H9 RIF1 KO cells showed a  
93 sharp genome wide peak of log<sub>2</sub>E/L values at zero (Fig 1b). Replication foci patterns assayed  
94 by BrdU incorporation, which track with genome wide RT (13) (Fig S3a), were also altered (Fig  
95 S3b) as RIF1 KO cells showed a loss of clear middle S phase patterns and 'blending' of early  
96 and middle replication foci patterns but maintained distinct early and late foci patterns (Fig S3a,  
97 b). Together, these results demonstrate a considerably more extensive role for RIF1 in RT  
98 control in hESCs than in any other mammalian cell type so far studied.

99

100 Previous reports have interpreted RT changes in RIF1 KO cells as distinct RT switches (8, 9,  
101 11) but the extent of the RT phenotype in RIF1 KO hESCs made us hypothesize that RIF1 KO  
102 results in a loss of temporal replication specificity resulting from increased cell to cell RT

103 heterogeneity within the population. To address this hypothesis, we applied our recently  
104 developed high resolution Repli-seq protocol (14), which uses a shorter nascent DNA labelling  
105 period and divides S phase into 16 small, evenly distributed fractions. High resolution Repli-seq  
106 produces RT heatmaps that capture peaks of replication initiation termed initiation zones (IZs)  
107 and large valleys of late replication that are sites of termination containing broadly distributed,  
108 low efficiency initiation events (14). Distinct changes in RT, such as those that occur during  
109 stem cell differentiation, manifest as clear EtL or LtE shifts of peaks and valleys on the temporal  
110 axis (14), whereas greater RT variation would manifest as highly diffused peaks or valleys  
111 resulting from reads spread out across many S phase fractions for any genomic location. High  
112 resolution Repli-seq of RIF1 KO cells revealed dramatic diffusion of RT patterns and loss of  
113 defined IZs in both HCT116 and H9 hESCs (Fig 1c, Fig S4a, b) indicating major RT variation  
114 within the cell population. EtL and LtE regions in RIF1 KO HCT116 cells called in E/L Repli-seq  
115 showed major loss of temporal control and replication across a broad distribution of times during  
116 S phase in the high resolution Repli-seq (Fig S4c). Surprisingly, even early replicating regions  
117 that were not called as statistically confident EtL switches in the HCT116 E/L Repli-seq also lost  
118 definition of IZs and RT control when assayed using the more sensitive high resolution Repli-  
119 seq (Compare Figs. 1a, c, Fig S4c). Thus, the entirety of the early replicating genome lost RT  
120 control upon RIF1 KO in both cell lines. By contrast, many late replicating regions in HCT116  
121 not called as LtE switches in E/L Repli-seq retained late replication control when assayed by  
122 high resolution Repli-seq (Fig S4c) indicating a separate, RIF1-independent mechanism  
123 controlling RT for these late regions in HCT116, which we will expand upon below. Remarkably,  
124 high resolution Repli-seq of RIF1 KO H9 hESCs resulted in a heatmap that lacked distinct IZs  
125 and valleys, suggesting a near complete genome-wide loss of temporal replication control in  
126 which any sequence can replicate at any time in the cell population (Fig 1d).

127  
128 To better quantify the extent and temporal direction of the loss of RT control, we calculated RT  
129 indices for all genomic bins of high resolution Repli-seq in WT and RIF1 KO samples where  
130 positive values indicate early replication and negative values indicate late replication (Fig S4d,  
131 Methods). Again, early replicating regions that were not called as EtL switches in the HCT116  
132 E/L Repli-seq showed noticeable changes in their RT indices similar to called EtL switches (Fig  
133 S4e). RT differences ( $RT_{diff}$ ) were then calculated by subtracting RIF1 KO RT indices from WT  
134 RT indices (Methods). We further applied a 3 component Gaussian Mixture model to  $RT_{diff}$   
135 distribution to identify genomic bins that were characterized by: 1) negative  $RT_{diff}$ , which are  
136 regions that are later replicating in WT and earlier replicating in KO, 2) positive  $RT_{diff}$ , which are

137 regions that are earlier replicating in WT and later replicating in KO, 3) close-to-zero  $RT_{diff}$ , which  
138 are regions that showed limited RT difference between WT and KO or could not be called as  
139 significantly different (Fig S4f, Methods). 86% and 78% of the genome showed significant  $RT_{diff}$   
140 in H9 and HCT116, respectively (Fig S4f table). These results demonstrate a much more  
141 significant effect of RIF1 loss on RT in both cell types than previously imagined.

142  
143 To examine the effect of RIF1 deletion on replication initiation within IZs genome wide, we  
144 divided each IZ called in high resolution WT Repli-seq data into timing categories based on the  
145 temporal position of the IZ peak in S phase (14) and plotted the cumulative percentage of DNA  
146 replicated through S phase in both WT and RIF1 KO cells (Fig 1d). WT cells showed typical  
147 segregation of IZs according to the temporal order associated with steady state replication and  
148 steep sigmoidal-like curves (14) while RIF1 KO cells showed major overlap of IZ classes and  
149 flatter sigmoidal-like curves (Fig 1d) showing that RIF1 KO caused loss of genome wide  
150 replication initiation timing specificity in both cell lines, with H9 hESCs losing any detectable  
151 temporal control. To quantify this change we calculated the parameter  $T_{width}$  as the time between  
152 when 25% and 75% of cells replicate for each genomic bin. A small  $T_{width}$  is indicative of a more  
153 deterministic replication scheme whereas a larger  $T_{width}$  is representative of greater heterogeneity.  
154 Genome wide measurement of  $T_{width}$  greatly increased in both cell types upon RIF1 KO indicating  
155 a major increase in RT heterogeneity (Fig S4g).

156  
157 To directly validate that the RT aberration seen in RIF1 KO was due to increased cell to cell RT  
158 heterogeneity we performed our recently developed single-cell Repli-seq (15) on human haploid  
159 HAP1 WT and RIF1 KO cells, which eliminate allelic RT variation to enable single cell analysis.  
160 RIF1 KO caused a major increase in RT heterogeneity genome wide, confirming this effect in a  
161 third cell line. We ranked binarized single cell RT profiles by their percentage of genome  
162 replicated indicating their progression through S phase and constructed heatmaps representing  
163 replicated or unreplicated windows for WT and RIF1 KO cells (Fig 1e). WT heatmaps  
164 correspond well to E/L Repli-seq, early replicating regions manifested as distinct domains that  
165 have finished replication early in S phase in the majority of cells whereas late replicating regions  
166 remained unreplicated until the later stages of S phase (Fig 1e). In KO heatmaps, however, the  
167 distinction between early and late replicating domains was blurred at all stages of S phase (Fig  
168 1e, Fig S4h). To quantify this heterogeneity genome wide we assumed a 10 hour S phase and  
169 calculated 'time from population average replication according to E/L RT values' at 0.1 intervals  
170 for each single cell (15) and plotted the relationship between percentage of genomic bins

171 replicated to their 'time from population average replication' in the form of heatmaps (Fig 1f). We  
172 then performed sigmoidal fitting on the heatmap and calculated the parameter  $T_{width}$  for each bin  
173 (See Methods). HAP1 WT cells'  $T_{width}$  was 3.9 hours while the absence of RIF1 greatly increased  
174 the  $T_{width}$  to 8.4 hours indicating a major increase in RT heterogeneity (Fig 1f). Taken together,  
175 both high resolution Repli-seq and single cell Repli-seq demonstrate that loss of RIF1 in 3  
176 human cell lines disrupts RT by dramatically increasing temporal heterogeneity of replication  
177 across the cell population rather than causing discrete RT shifts in all cells.

178  
179 Mouse RIF1 was previously reported to bind late replicating chromatin (11). We performed  
180 Cut&Run (16) against GFP on GFP tagged RIF1 in HCT116 and H9 hESCs (Fig S1a, b) to map  
181 RIF1 binding in human cells. Consistent with mESCs (11), RIF1 binding was enriched in the late  
182 replicating portion of the genome in both cell lines (Fig S5a) and bound chromatin in broad  
183 domains rather than distinct peaks (Fig 2a). We first divided the late replicating genome into  
184 regions that lost RT control upon RIF1 KO, characterized by continuous bins displaying negative  
185  $RT_{diff}$  (Fig 2b blue in WT, red in KO) and those that maintained their late RT upon RIF1 KO,  
186 characterized by continuous bins displaying close-to-zero  $RT_{diff}$  (Fig 2d blue in WT, blue in KO).  
187 These regions are hereafter referred to as 'affected' or 'unaffected' late regions respectively (Fig  
188 2a, b, c, d). RIF1 binding was especially enriched at affected domains (Fig 2a, e) while  
189 unaffected domains showed lower RIF1 enrichment in both cell lines (Fig 2c, e). Contrary to  
190 what was reported in mESCs (11), unaffected regions showed no preferential association with  
191 the nuclear lamina than affected regions via Lamin B1 DamID (Fig 2b, c).

192  
193 To further investigate these late replicating regions, we performed ChIP-seq on the late  
194 replication associated marks H3K9me3 and H3K27me3 in both HCT116 and H9 hESC RIF1 KO  
195 cells. H3K9me3 marked regions manifest as either small peaks or large megabase scale  
196 domains (17). In WT cells, affected regions were enriched for smaller H3K9me3 peaks while  
197 unaffected regions contained larger H3K9me3 domains (Fig 2a, c, e, Fig S5b). RIF1 KO caused  
198 genome wide changes to H3K9me3 peaks and domains in both cell lines (Fig S5c). Without  
199 RIF1, small H3K9me3 peaks were lost, coincident with a loss in RT control (Fig 2a, c, e).  
200 However, the large H3K9me3 domains, which are far more abundant in HCT116 than H9  
201 hESCs, dramatically increased in their density of H3K9me3 and retained their late RT in the  
202 absence of RIF1 (Fig 2c, e). In fact, almost all regions that retained late RT in RIF1 KO HCT116  
203 cells (n=209) were large H3K9me3 domains. The rare domains that retained late RT in H9  
204 hESCs (n=49) were also large H3K9me3 domains. Overall levels of H3K9me3 within RIF1 KO

205 H9 hESCs did not change compared to WT (Fig S5d) suggesting that total H3K9me3 is  
206 redistributed rather than gained or lost upon RIF1 KO. Most H3K9me3 unaffected regions do  
207 not overlap between cell types, consistent with the model that these H3K9me3 domains are  
208 developmentally regulated and implicated in silencing of lineage inappropriate genes (17) (Fig  
209 S5e). By contrast, H3K27me3 changes after RIF1 KO were cell type specific (Fig 2a, c, e).  
210 H3K27me3 peaks were enriched at affected regions but depleted from unaffected regions in WT  
211 HCT116 cells and these distributions were unaffected by RIF1 KO (Fig 2a, c, e). However,  
212 H3K27me3 was similar to H3K9me3 in H9 hESCs in that RIF1 loss resulted in the depletion of  
213 H3K27me3 peaks at affected regions and enrichment at the few unaffected regions (Fig 2a, c,  
214 e). Thus, RIF1 and H3K9me3 domains are two separate mechanisms that orchestrate late RT  
215 to different extents in different cell types.

216  
217 The strong association between late replication and B compartmentalization as defined by  
218 negative PC1 Eigenvector values (18, 19) compelled us to investigate the genomic  
219 compartmentalization and architecture of RIF1 KO cells by Hi-C (20). Surprisingly, we found that  
220 affected and unaffected regions, despite being similarly late replicating, have distinct  
221 compartmental identities. In WT cells unaffected regions were associated with more negative  
222 PC1 Eigenvector values and thus interacted more strongly with other B compartment regions  
223 than affected regions (Fig 2f), while affected regions showed a slight interaction preference to  
224 the A compartment particularly in HCT116 cells (Fig 2f). Upon RIF1 KO, the interaction between  
225 unaffected regions with the rest of the B compartment was strengthened whereas affected  
226 regions display more preferential interactions with the A compartment (Fig 2f) indicating RIF1  
227 delays the replication of regions in A compartment that would otherwise be earlier replicating.  
228 Moreover, WT interactions between unaffected regions were significantly stronger than  
229 interactions between affected regions or interactions between unaffected regions and affected  
230 regions (Fig 2g) further confirming that affected and unaffected regions are two intrinsically  
231 different classes of late replicating regions with distinct interaction preferences. These distinct  
232 interaction preferences further increase in RIF1 KO (Fig 2g). We next looked to see if RIF1 KO  
233 had an effect on the distribution of histone marks between genomic compartments by plotting  
234 the aggregate log<sub>2</sub> fold enrichment of histone modification ChIP-seq centered at the A/B  
235 compartment boundary (Fig 2h). H3K9me3 was depleted from the A compartment and enriched  
236 in the B compartment in HCT116 RIF1 KO cells (Fig 2h) consistent with the fact that in HCT116  
237 affected regions were more associated with the A compartment while unaffected regions were  
238 predominately within the B compartment (Fig 2f). Similarly, RIF1 KO H9 hESCs had depleted

239 H3K9me3 in the A compartment, however the B compartment as a whole also lost H3K9me3  
240 (Fig 2h) as the majority of B compartment regions were affected and lost late replication  
241 specificity. H3K27me3 changes were cell type specific as distributions remained largely  
242 unchanged in HCT116 but showed a decrease in both compartments in H9 hESCs (Fig 2h).  
243 These data indicate RT affected and unaffected regions are two distinct classes of late  
244 replicating chromatin which are differentially affected by RIF1 KO.

245  
246 New interactions evident in Hi-C contact maps were formed between unaffected regions that  
247 became highly enriched for H3K9me3 in RIF1 KO cells (Fig 2i). Interactions between H3K9me3  
248 peaks were strengthened after RIF1 KO and driven by enriched H3K9me3 domains in  
249 unaffected regions (Fig S5f, g). We further sorted and binned intra B-compartment interactions  
250 according to the extent of H3K9me3 peak changes (negative: downregulated, positive:  
251 upregulated). In WT cells upregulated H3K9me3 domains and downregulated H3K9me3 peaks  
252 form separate interaction hubs within the B compartment (Fig 2j left). Interactions within these  
253 hubs, particularly the upregulated H3K9me3 domains, strengthen dramatically upon RIF1 KO  
254 (Fig 2j right). These results demonstrate that H3K9me3 domains form strong interactions with  
255 one another constituting one type of B compartment that maintains its late RT and strengthens  
256 its interactions without RIF1 whereas regions that lack large H3K9me3 domains form a separate  
257 hub of interactions and require RIF1 to enforce late replication.

258  
259 RIF1 KO and subsequent loss of global RT not only caused substantial changes in B  
260 compartment associated chromatin modifications and interactions, but it also had a genome-  
261 wide effect on A compartment associated chromatin modifications. ChIP-seq on H3K27ac and  
262 H3K4me3 revealed a genome wide reduction of H3K27ac peaks (Fig S5h) along with specific  
263 changes in H3K4me3 in RIF1 KO cells. Similar to H3K9me3, RIF1 KO did not cause a change  
264 in global levels of H3K27ac in H9 hESCs compared to WT (Fig S5i) again suggesting  
265 redistribution rather than global reduction of chromatin marks upon RIF1 KO. H3K27ac and  
266 H3K4me3 became majorly depleted in the A compartment of both cell lines with mild increases  
267 in their association with the B compartment (Fig 3a). Loss of active marks from the A  
268 compartment, particularly H3K27ac, was concurrent with changes in compartmentalization and  
269 Hi-C contacts in both cell lines. In H9 hESCs the majority of compartment changes were the  
270 disappearance of small A compartments into neighboring B compartments (Fig 3b, c), while  
271 HCT116 exhibited discrete shifts in compartmentalization in both directions from A to B as well  
272 as B to A (Fig 3b). In both cell lines the compartmental switches lead to a more consolidated



273 appearance in the correlation matrix heatmap (Fig 3b). Loss of A compartment interactions in  
274 Hi-C contact maps corresponded to reduced H3K27ac peaks in both cell lines (Fig 3c (arrows)).  
275 Within all A to B compartment switches genome wide the level of H3K27ac was majorly  
276 depleted in both cell lines (Fig 3d). Genome-wide interaction pileups showed specific  
277 interactions between H3K27ac peaks and all other H3K27ac peaks were drastically reduced at  
278 A to B compartment switches (Fig 3e). Changes in genome organization were not due to  
279 changes in cell cycle distributions as RIF1 KD H9 hESCs exhibited similar changes to cell cycle  
280 as KO (Fig S1d, e) without changes in genome organization (Fig S2d, e, f). These data strongly  
281 suggest that depletion of active histone modifications, particularly H3K27ac, leads to loss of A  
282 compartment interactions in RIF1 KO cells.

283  
284 Both cell lines exhibited genome wide weakening of A/A interactions accompanied by  
285 strengthening of B/B interactions (Fig 3f). This was further confirmed when we called statistically  
286 significant differential interactions (strengthened and weakened) using diffHiC (21).  
287 Strengthened interactions were seen predominantly within the B compartment and weakened  
288 interactions were concentrated in the A compartment in both cell lines (Fig S6a, b). This is likely  
289 the combined effect of strengthened interactions between upregulated H3K9me3 domains  
290 within the B compartment (Fig S5f, g) and weakened interactions between downregulated  
291 H3K27ac peaks in the A compartment (Fig 3e). Together these data indicate a substantial  
292 reorganization of compartments in accordance with epigenome changes in RIF1 KO cells.

293  
294 TAD boundaries, called by directionality index (DI) (22), also changed locally in conjunction with  
295 shifts in RT and epigenetic state. In individual cases where a large late replicating domain broke  
296 into an unaffected region and an affected region upon RIF1 KO, a new TAD boundary formed in  
297 accordance with the new RT boundary demarcated by enriched H3K9me3 showing that  
298 changes in chromatin state correlated with loss of RT control can permit the formation of new  
299 TAD boundaries (Fig S7a). New TAD boundaries were formed within affected late regions in  
300 HCT116, consistent with their earlier RT indices and increased A-compartment association (Fig  
301 S7b bottom, c) as early replicating, A compartment chromatin typically contains numerous TADs  
302 while late, B compartment chromatin contains fewer TADs (22). Reciprocally, boundaries were  
303 also lost in regions of later RT (Fig S7b top). Genome wide, the number (~4000 in H9 hESC and  
304 ~2600 in HCT116) and positioning of TAD boundaries remained similar between WT and RIF1  
305 KO (Fig S7d), while the strength of TAD boundaries was increased in RIF1 KO measured by  
306 insulation score (Fig S7d, e, f). Consistently, the ratio of intra-TAD/inter-TAD interactions was

307 increased in RIF1 KO, particularly in HCT116, (Fig S7g) suggesting overall TAD strengthening.  
308 CHIP-seq of the essential TAD protein cohesin's subunit Rad21 revealed largely unaffected  
309 binding with a small number of up and down regulated peaks in both cell lines (Fig S8a).  
310 Focusing on the interactions at common, up, and down regulated Rad21 peaks, we found that  
311 boundaries were strengthened around common and up regulated peaks in both cell lines (Fig  
312 S8b). In HCT116, boundaries were strengthened even around downregulated peaks (Fig S8b  
313 left) suggesting changes in TAD boundaries were not due to changes in Rad21 peak intensity.  
314 In H9 hESCs, we observed weakening of boundaries around the small number of  
315 downregulated Rad21 peaks (Fig S8b right). However, such boundaries were weak boundaries  
316 in WT and constituted a small fraction of total boundaries (Fig S8b right). Overall, these data  
317 mechanistically separate RT from TAD formation and support previous work showing essential  
318 TAD proteins Rad21 and CTCF are dispensable for global RT control (23–25).

319  
320 To investigate if the profound changes in genome organization and epigenetic state seen in  
321 RIF1 KO cells affected gene expression we performed RNA-seq on WT and RIF1 KO HCT116  
322 and H9 hESCs. With the threshold for called change set at FDR < 0.1, RIF1 KO caused 2284  
323 genes (1378 upregulated, 906 downregulated) in H9 hESCs and 1737 genes to change  
324 expression (818 upregulated, 919 downregulated) in HCT116 (Fig S9a). Gene ontology (GO)  
325 analysis revealed expression changes for genes important for cancer progression in HCT116  
326 and developmentally regulated genes in H9 hESCs (Fig S9b). However, H9 hESCs devoid of  
327 RIF1 did not have significantly reduced expression of Oct4, Nanog, Sox2, Rex1, or any other  
328 key pluripotency factors (Fig S9c), consistent with their ability to self-renew (Fig S1c) with no  
329 morphological signs of differentiation. RT and chromatin compartmentalization are correlated  
330 with gene expression (1), however we observed no universal pattern linking changed gene  
331 expression and changed RT or compartmentalization. Neither changes in RT nor compartment  
332 switches were able to predict gene expression changes in RIF1 KO cells of either cell type (Fig  
333 S9d, e). Loss of late timing was not correlated with increased gene expression nor was loss of  
334 earlier timing correlated with decreased expression (Fig S9d). Similarly, shifts from the B to A  
335 compartment were not correlated with increased gene expression nor were shifts from A to B  
336 correlated with downregulated expression (Fig S9e). However, the WT chromatin context of  
337 differentially expressed genes did correlate with expression changes. In H9 hESCs where the  
338 epigenetic landscape is plastic (26, 27) earlier replicating genes with strong A compartment  
339 association in WT cells were likely to be downregulated while later replicating genes with weak  
340 A compartment association in WT cells were likely to be upregulated upon RIF1 KO (Fig S9d, f).

341 In HCT116 cells, only genes in early replicating, A compartment chromatin were differentially  
342 expressed (both up and downregulated) and mostly maintained their early replication (albeit  
343 more temporally heterogeneous) and A compartmentalization upon RIF1 KO (Fig S9d, e, f, g).  
344 Conversely, specific chromatin modifications were more correlated to gene expression changes  
345 upon RIF1 loss than changes in RT or 3D genomic organization. Differentially expressed genes  
346 showed cell type specific changes in the distribution of specific histone modifications around  
347 their TSSs that correlated with expression changes (Fig S9h). In H9 hESCs H3K27me3 was  
348 high in WT cells around TSSs of upregulated genes and decreased upon RIF1 KO while levels  
349 of H3K27me3 remained constantly low around downregulated genes (Fig S9h, left). WT  
350 H3K9me3 levels were low around both up and downregulated genes and didn't change  
351 significantly upon RIF1 KO (Fig S9h, left). Both up and downregulated TSSs showed similar  
352 changes to the active marks that reflected the global trend of change. H3K27ac was diminished  
353 and H3K4me3 remained largely constant (Fig S9h, left). Taken together, random forest  
354 regression feature importance analysis showed H3K27me3 to be most important in predicting  
355 gene expression changes in H9 hESCs (Fig S9i). As most genes that were differentially  
356 expressed in HCT116 were associated with the A compartment and early replication in WT  
357 cells, these TSSs showed changes in histone mark distribution similar to changes in the A  
358 compartment as a whole (Fig 2j bottom, Fig 3a bottom). H3K27ac was diminished while  
359 H3K27me3 levels remained constant at both up and down regulated genes (Fig S9h, right).  
360 However, changes in H3K4me3 levels did correlate with expression changes (Fig S9h, right). In  
361 summary, we found changes in histone modifications around the TSS were considerably more  
362 predictive of gene expression changes than changes to RT and genome compartmentalization.

363

364 Temporal separation of the genome into early and late replicating chromatin is thought to help  
365 coordinate chromatin states after the passage of the replication fork where early replicating  
366 chromatin is likely to be assembled into open euchromatin while late replicating chromatin is  
367 likely to be assembled into heterochromatin (5). However, there has been no evidence for this  
368 on native mammalian chromosomes due to the prior inability to manipulate RT. We found that  
369 loci depleted for H3K27ac were in genomic bins that became later replicating on the population  
370 level as a result of RIF1 KO (Fig 3g top). Reciprocally, those few peaks that became more  
371 enriched for H3K27ac in RIF1 KO were in bins that became earlier replicating (Fig 3g top). A  
372 similar correlative change was seen at H3K9me3 peaks where loci that became depleted for  
373 H3K9me3 became earlier replicating while enriched peaks became later replicating (Fig 3g  
374 bottom). This correlation is consistent with the model that RT plays a role in establishing the

375 characteristics of nascent chromatin (5). Our observation that global histone modification levels  
376 are not affected by RIF1 KO (Fig S5d, i) also supports this model as altered RT would predict  
377 redistribution of chromatin modifications rather than global gain or loss of histone marks.  
378 Furthermore, RIF1 KD in H9 hESCs showed mild disruptions to RT (Fig S2b, c), but no changes  
379 in genome compartmentalization (Fig S2d, e, f) indicating that RIF1's primary role is to control  
380 RT and disruptions to epigenetic state and genome architecture are downstream and manifest  
381 only when RT disruption are severe.

382  
383 To more directly address RIF1's primary mode of action we took advantage of the auxin  
384 inducible degron (AID) system (28) in HCT116 cells to rapidly degrade GFP tagged RIF1. After  
385 24 hours of RIF1 degradation (Fig 4a) constituting ~1 cell cycle the RT phenotype observed in  
386 RIF1 KO HCT116 cells was fully recapitulated while changes to genome organization were not  
387 as striking as RIF1 KO. Genome wide RT defects assayed by E/L Repli-seq (Fig 4b, c) showed  
388 RT values centered around zero  $\log_2 E/L$  and the retention of a subset of late replicating regions  
389 in RIF1-AID cells similar to RIF1 KO (Fig 4b, c). However, RIF1-AID depleted cells showed few  
390 compartmentalization switches (Fig 4d) and genome-wide intra- and inter- compartment  
391 interactions were similar to RIF1-AID control cells (Fig 4e). Moreover, Euclidean distance  
392 measurements between RIF1-AID depleted cells and either RIF1-AID control cells or RIF1 KO  
393 cells showed genome wide RT values of RIF1-AID depleted cells were closer in Euclidean  
394 distance and thus more similar to RIF1 KO cells. By contrast, genome wide Hi-C  
395  $\log_2(\text{observed/expected})$  values of RIF1-AID depleted cells were more similar to RIF1-AID  
396 control cells (Fig 4f). Furthermore, RIF1-AID depleted cells did not show increased interactions  
397 between upregulated H3K9me3 domains called in RIF1 KO HCT116 cells (Fig 4g, h; compare  
398 to Fig 2j and Fig S5d respectively) nor did these cells lose interaction between depleted  
399 H3K27ac peaks called in RIF1 KO HCT116 cells (Fig 4i; compare to Fig 3e) suggesting that the  
400 epigenetic chromatin state and thus genome compartmentalization are maintained after 24  
401 hours of RIF1 depletion despite a nearly complete effect on RT. These data provide further  
402 evidence that RIF1's primary role is to control RT and suggest that several cell cycles of  
403 severely disrupted genome wide RT is required to significantly affect genome  
404 compartmentalization, placing altered RT upstream of the other changes.

405  
406 In conclusion, we have shown that late replicating genome is composed of two types of  
407 domains, whose delayed replication is enforced by either H3K9me3 or RIF1. The two types of  
408 domains form separate hubs of B compartment interactions. Deletion of RIF1 results in genome

409 wide RT disruption resulting from an increase in cell to cell heterogeneity of replication initiation  
410 rather than discrete changes in RT. In both hESCs and HCT116 cells, RIF1 KO leads to  
411 widespread aberrant histone modification patterns which correlate with distinct genome-wide  
412 changes in 3D genome architecture and gene expression. We further show that RT abrogation  
413 precedes changes in compartmentalization. We propose that RT changes due to RIF1 KO  
414 results in aberrant re-establishment of epigenetic marks at replication forks that causes  
415 profound changes in the epigenetic landscape that then alter genome architecture (Fig 4j) rather  
416 than RIF1 acting directly to control genome organization as has been previously proposed (11).  
417 We also show that despite massive epigenetic de-regulation, cells proliferate nearly normally.  
418 Since Rif1 KO mice die in utero after gastrulation (29), we speculate that RIF1 is needed to  
419 coordinate epigenetic changes during cell fate transitions but it, and the proper regulation of  
420 epigenetic state, is dispensable for basic cell growth and proliferation. Further exploration of the  
421 effects of RIF1 KO on lineage commitment in hESCs us thus poised to unveil insights into the  
422 role of epigenetic stability in early human development. Our work establishes RIF1 as a key  
423 regulator of epigenome maintenance through its role in RT establishment. Our experiments  
424 exploit this role of RIF1 to provide the first mechanistic evidence linking the RT program with  
425 maintenance of the global epigenetic state.

426

#### 427 **Figure Legends:**

428

#### 429 **Figure 1. RIF1 controls RT by reducing cell to cell variation in replication timing.**

430 a, E/L Repli-seq plots of Chr1 172.6-197.6 Mb in WT and two RIF1 KO clones overlaid in H9  
431 hESCs (top) and HCT116 (middle) and HAP1 (bottom) cell lines. b, Genome wide probability  
432 density of E/L RT values in H9 hESCs (left), HCT116 (middle), and HAP1 (right) WT (black) and  
433 RIF1 KO (blue and red). c, High resolution Repli-seq plots of Chr1 172.6-197.6 Mb in WT and  
434 RIF1 KO in H9 hESCs (top two) and HCT116 (bottom two); same locus as a. d, Cumulative  
435 percent-replicated plots for each IZ called in WT cells versus S phase fraction of 16 fraction  
436 Repli-seq color coded by their timing (red: early, blue: early mid, green: late mid, black: late). e,  
437 Binarized single-cell Repli-seq heatmaps of Chr4 in HAP1 WT (top) and RIF1 KO (bottom)  
438 sorted by percentage replicated where the top row represents the cell with the lowest  
439 percentage of genome replicated and the last row represents the cell with the most percentage  
440 of genome replicated. f, Sigmoidal fitting of the percentage replicated against time in hours from  
441 population average replication for HAP1 WT (left) and RIF1 KO (right). The heatmaps (blue for  
442 WT and red for KO) represent the data spread of percentage replicated (y-axis) against time

443 from population average replication (x-axis) for all 50kb bins genome wide for all cells. Dotted  
444 lines at 25% of cells replicated and 75% of cells replicated indicate the span of  $T_{width}$ .

445

446 **Figure 2. RT affected and unaffected regions are distinct classes of chromatin.**

447 a, Affected region at Chr1 94.3-101.6 Mb in HCT116 (left) and Chr1 66.75-71.4 Mb in H9  
448 hESCs (right) showing from top to bottom: 16 fraction Repli-seq in WT and RIF1 KO cells, RIF1  
449 Cut&Run in WT cells, Lamin B1 DamID in WT cells, H3K9me3 ChIP-seq in WT and RIF1 KO  
450 cells, and H3K27me3 ChIP-seq in WT and RIF1 KO cells. b, Heat maps of RT indices for  
451 affected regions in WT and RIF1 KO of HCT116 and H9 hESCs. c, Unaffected region at Chr9  
452 113.95-122.3 Mb in HCT116 (left) and Chr1 151.7-153.75 Mb in H9 hESCs (right) showing the  
453 same panels as a. d, Heat maps of RT indices for unaffected regions in WT and RIF1 KO of  
454 HCT116 and H9 hESCs. e, Fold enrichment signal pile ups of signal from indicated assay in  
455 HCT116 (left) and H9 hESC (right) WT or RIF1 KO cells centered on affected regions (top) or  
456 unaffected regions (bottom)  $\pm 4$  Mb and sorted by size. Line plots represent cumulative signal in  
457 WT (black) and RIF1 KO cells (blue). f, Violin plots of PC1 Eigenvector values for LtE and  
458 unaffected chromatin loci in WT and RIF1 KO HCT116 (left) and H9 hESCs (right); (\*\*p <  
459 0.0005, \*\*p < 0.005). g, Box plots of interaction strength between and within LtE and unaffected  
460 chromatin domains in WT and RIF1 KO HCT116 (left) and H9 hESCs (right); (\*\*p < 0.0005, \*\*p  
461 < 0.005). h, Pile up line plots of indicated histone marks at A to B compartment boundary  $\pm 1$  Mb  
462 in WT (black) and RIF1 KO (blue) HCT116 and H9 hESCs. i, H3K9e3 ChIP-seq tracks beside  
463 ICE normalized Hi-C contact maps of HCT116 WT and RIF1 KO. j, Log<sub>2</sub>(obs/exp) aggregate  
464 interactions between B compartments in WT and RIF1 KO HCT116 (top) and H9 hESCs  
465 (bottom), The interactions were binned into 11 equal segments, which were ranked by  
466 increasing delta H3K9me3 within B compartments where negative and positive values indicate  
467 decrease and increase in H3K9me3 between WT and RIF1KO.

468

469 **Figure 3. RIF1 KO causes global alterations of compartments and epigenetic state.**

470 a, Pile up line plots of indicated histone marks at A to B compartment boundary  $\pm 1$  Mb in WT  
471 (black) and RIF1 KO (blue) HCT116 and H9 hESCs. b, Correlation matrices and PC1  
472 Eigenvector of Chr4 in WT and RIF1 KO H9 hESCs (top) and HCT116 (bottom). c, Example ICE  
473 normalized Hi-C contact map of Chr6 91.6-167.8 Mb in H9 hESC (top) and Chr4 138.75-171.35  
474 Mb in HCT116 (bottom) WT and RIF1 KO cells with accompanying PC1 Eigenvector plots.  
475 Eigenvector plots are overlaid between contact maps. Below are expanded views of insets 1  
476 and 2 with accompanying H3K27ac ChIP-seq plots. Arrows indicate compartments and ChIP-

477 seq peaks that are lost upon RIF1 KO. d, Fold enrichment signal pile ups for H3K27ac centered  
478 on AtoB compartment switching regions  $\pm 1$  Mb in WT and RIF1 KO cells sorted by size. Line  
479 plots represent cumulative signal in WT (black) and RIF1 KO (blue) cells. e, Aggregate Hi-C  
480  $\log_2(\text{obs}/\text{exp})$  interactions between H3K27ac peaks within AtoB compartment switching regions  
481  $\pm 1.2$  Mb in WT and RIF1 KO H9 hESCs. f, Genome wide saddle plots in WT and RIF1 KO cells.  
482 g, Scatterplot of the RT values for upregulated (red) and downregulated (black) H3K27ac peaks  
483 in WT (x axis) and RIF1 KO (y axis) HCT116 cells calculated from high resolution Repli-seq  
484 data.

485

486 **Figure 4. RT effects precede compartment changes.**

487 a, Images of HCT116-mAID-mClover nuclei after 24 hrs with DMSO (top) or 500uM Auxin  
488 (bottom). b, E/L Repli-seq plots of Chr1 172.6-197.6 Mb in HCT116 RIF1-mAID-mClover cells  
489 plus 24hrs DMSO (black), plus 24hrs Auxin (grey) and HCT116 RIF1 KO (blue). c,  $\log_2$  (E/L) RT  
490 probability density plots of HCT116-mAID-mClover cells plus 24hrs DMSO (black), plus 24hrs  
491 Auxin (grey) and RIF1 KO (blue) HCT116 cells. d, E/L  $\log_2(\text{RT})$  (top row), PC1 Eigenvector  
492 (middle row) and correlation matrices (bottom row) of Chr6 95.5-154 Mb in HCT11-mAID-  
493 mClover cells plus 24hrs DMSO (left), plus 24hrs Auxin (middle) and RIF1 KO HCT116 (right).  
494 e, Saddle plots showing *cis*-compartmental contacts of HCT11-mAID-mClover cells plus 24hrs  
495 DMSO (left) and plus 24hrs Auxin (right) binned into 50 segments of increasing PC1  
496 Eigenvector values. f, Ordered Euclidian distance measurements for genome wide RT (left) and  
497 genome wide  $\log_2(\text{obs}/\text{exp})$  (right) between HCT116 RIF1-mAID-mClover plus 24hrs Auxin and  
498 either HCT116 RIF1-mAID-mClover control cells (black) or HCT116 RIF1 KO cells (blue). g,  
499  $\log_2(\text{obs}/\text{exp})$  aggregate interactions between B compartments in HCT116 RIF1-mAID-  
500 mClover cells plus 24hrs DMSO (left) and plus 24hrs Auxin (right). The interactions were binned  
501 into 11 equal segments ranked by  $\Delta$  H3K9me3 between WT HCT116 and RIF1KO HCT116.  
502 h, Aggregate Hi-C  $\log_2(\text{obs}/\text{exp})$  interactions  $\pm 1.5$  Mb between H3K9me3 domains as defined in  
503 RIF1 KO HCT116 cells in HCT116 RIF1-mAID-mClover cells plus 24hrs DMSO (left) and plus  
504 24hrs Auxin (right). i, Aggregate Hi-C  $\log_2(\text{obs}/\text{exp})$  interactions  $\pm 1.2$  Mb between H3K27ac  
505 peaks within AtoB compartment switching regions as defined in RIF1KO HCT116 cells in  
506 HCT116 RIF1-mAID-mClover cells plus 24hrs DMSO (left) and plus 24hrs Auxin (right).j, A  
507 model figure depicting the role of replication timing in maintaining epigenetic status and  
508 compartmentalization. In WT cells temporal segregation of replication contributes to the  
509 likelihood of nascent chromatin to be assembled into euchromatin (early replicating) or  
510 heterochromatin (late replicating). RIF1 and H3K9me3 maintain this temporal segregation in WT

511 cells and allow for preferential 3D contacts between like chromatin types. In RIF1 KO cells this  
512 temporal segregation is majorly disrupted, decreasing the likelihood of nascent chromatin  
513 assembly into the correct parental form and disrupting 3D contacts between chromatin.

514

515

516 **Supplementary Materials:**

517

518 **Fig. S1. CRISPR/Cas9 RIF1 KO does not cause cell cycle arrest.**

519 a, RIF1 KO in H9 hESCs was achieved by CRISPR/Cas9 cutting at regions up and down  
520 stream of exon 3 in the RIF1 coding sequence. Knock in of an eGFP tag was achieved by  
521 CRISPR/Cas9 cutting at a region near the start codon and providing a repair vector containing  
522 the eGFP coding sequence and flanking homology arms. RIF1 KO HAP1 cells were purchased  
523 from Horizon Discovery (HZGHC000663c010) but had a similar deletion of exon3. b, RIF1 GFP  
524 tagging in HCT116 was achieved by CRISPR/Cas9 cutting at regions upstream of exon 2 and  
525 downstream of exon 3 and providing a repair vector that contained an eGFP tagged version of  
526 exon 2 and a loxP flanked exon 3 as well as a blasticidin resistance gene. Cre expression was  
527 then used to remove exon 3. In both cell lines removal of exon 3 caused a premature stop  
528 codon to be added to the RIF1 mRNA and thus a nonfunctional, truncated protein produced. c,  
529 Immunoblot of RIF1 protein in WT and two KO clones of HCT116 and H9 hESCs. Ponceau S  
530 total protein stain shown as loading control. d, 2-dimensional (2D) cell cycle analysis using  
531 FACS to detect incorporation of 488 anti BrdU (y axis) and DNA content by propidium iodide (x  
532 axis) in WT and RIF1 KO cells. e, Average bar plots of three replicates of 2D FACS analysis for  
533 each sample with standard deviation error bars; table of p values by t-test between comparators  
534 for each cell line. f, E/L repli-seq plot of chr2 in WT (black) and two clones of RIF1 KO (blue and  
535 red) H9 hESC (top). E/L repli-seq plot of chr1 in WT (black) and RIF1 KO (blue) mouse ESCs  
536 from (11)(bottom).

537

538 **Fig. S2. RIF1 KD in H9 hESCs causes intermediate RT changes with no change to**  
539 **genome compartmentalization.**

540 a, Immunoblot of control and RIF1 shRNA in H9 hESCs. b, Repli-seq data of Chr1 172.6-197.6  
541 Mb in control shRNA and RIF1 shRNA H9 hESCs. Same region as RIF1 KO in Fig 1a. c,  
542 Genome wide probability density of E/L Repli-seq RT values in control and RIF1 shRNA H9  
543 hESCs. d, Scatterplot of genome wide PC1 eigenvector values for 250kb bins between RIF1  
544 shRNA H9 hESCs (x axis) and control shRNA H9 hESCs (y axis) (top). Scatterplot of genome



545 wide PC1 eigenvector values for 250kb bins between RIF1 KO H9 hESCs (x axis) and WT H9  
546 hESCs (y axis) (bottom) e, Region Chr3 148.25-151.75 Mb of E/L RT and PC1 eigenvector in  
547 shRNA H9 hESCs and RIF1 KO H9 hESCs. f, Log<sub>2</sub>(obs/exp) aggregate Hi-C interactions  
548 centered on genome wide H3K27ac peaks  $\pm 1.2$  Mb in control shRNA, RIF1 shRNA, and RIF1  
549 KO H9 hESCs.

550

551 **Fig. S3. Replication foci patterns are disrupted in RIF1 KO cells.**

552 a, Example BrdU incorporation patterns of S phase human cells. b, Quantification of percentage  
553 of S phase BrdU incorporation patterns in WT and RIF1 KO H9 hESCs and HCT116.

554

555 **Fig. S4. High resolution and single cell Repli-seq reveal major RT heterogeneity in RIF1**  
556 **KO cells.**

557 a, High resolution Repli-seq pile up plots in WT and RIF1 KO H9 hESCs and HCT116 centered  
558 on IZs timing categories called in WT cells  $\pm 750$  Kb. b, Log<sub>10</sub> fold enrichment qPCR results of  
559 BrdU incorporated mouse DNA spike in target over BrdU negative mouse DNA spike in  
560 background after BrdU immunoprecipitation of each S phase fraction in WT and RIF1 KO H9  
561 hESCs and HCT116 cells to approximate pull-down efficiency. WT and RIF1 KO of both cell  
562 lines show consistent and similar pull-down efficiencies. c, High resolution Repli-seq pile ups  
563 centered on RT changed regions called in E/L Repli-seq data (top) and RT unchanged regions  
564 called in E/L Repli-seq (bottom) in WT and RIF1 KO HCT116  $\pm 750$  Kb. d, RT indices calculation  
565 method used in e. e, RT indices calculated from high resolution Repli-seq for RT changed  
566 regions called in E/L Repli-seq data (top) and RT unchanged regions called in E/L Repli-seq  
567 (bottom) in WT and RIF1 KO HCT116. H9 hESCs RT indices not shown because of similarity  
568 between all indices in RIF1 KO. Examples H9 hESC RT indices in Fig 2b. f, Genome wide  
569 probability density plots of RT changes between WT and KO for each cell line, calculated from  
570 high resolution Repli-seq. Dotted lines indicate those regions called as having negative RT<sub>diff</sub>  
571 (green), close-to-zero RT<sub>diff</sub> (grey), or positive RT<sub>diff</sub> (red). Table shows percentages of genome  
572 within each category. g, Violin plots of genome wide T<sub>width</sub> of high resolution Repli-seq data in WT  
573 and RIF1 KO H9 hESCs and HCT116. h, Boxplot of population-based E/L Repli-seq RT for  
574 replicated (red) and unreplicated (grey) bins for each single-cell in both WT (top) and RIF1 KO  
575 (bottom) HAP1 ranked between 30 and 70% S-phase progression.

576

577 **Fig. S5. RIF1 and H3K9me3 control late replication via independent mechanisms.**

578 a, Histogram of RIF1 Cut&Run read density versus genome wide RT in H9 hESCs and  
579 HCT116. b, Boxplots of size distributions of H3K9me3 peaks or domains in affected and  
580 unaffected regions in WT H9 hESCs and HCT116; \*\*\* $p < 0.0005$ . c, Scatterplot of H3K9me3  
581 peaks in WT (x axis) and RIF1 KO (y axis) cells. Significant peak differences are those with at  
582 least 2-fold difference and an FDR  $< 0.05$ . Upregulated peaks colored in green and  
583 downregulated peaks colored in cyan. d, Immunoblot of H3K9me3 in WT and RIF1 KO H9  
584 hESCs at three dilutions. Ponceau S total protein stain shown as loading control. e, Venn  
585 Diagrams of shared H3K9me3 domains (left) and unaffected RT regions (right) between RIF1  
586 KO HCT116 and H9 hESCs. f,  $\text{Log}_2(\text{obs}/\text{exp})$  aggregate Hi-C interactions between H3K9me3  
587 peaks genome wide  $\pm 1.5$  Mb in WT and RIF1 KO HCT116 and H9 hESCs. g,  $\text{Log}_2(\text{obs}/\text{exp})$   
588 interactions between H3K9me3 peaks as called in f over genomic distance in WT (black) and  
589 RIF1 KO (red) cells.  $\text{Log}_2(\text{obs}/\text{exp})$  interactions between upregulated H3K9me3 peaks (left).  
590  $\text{Log}_2(\text{obs}/\text{exp})$  interactions between downregulated H3K9me3 peaks (middle).  $\text{Log}_2(\text{obs}/\text{exp})$   
591 interactions between upregulated and downregulated H3K9me3 peaks (right). h, Scatterplot of  
592 H3K27ac peak RPM in WT (x axis) and RIF1 KO (y axis) cells. Significant peak differences are  
593 those with at least 2-fold difference and an FDR  $< 0.05$ . Upregulated peaks colored in green ( $n$   
594 = 5697 in RIF1 KO H9 hESCs,  $n = 3646$  in RIF1 KO HCT116) and downregulated peaks  
595 colored in cyan ( $n = 61617$  in RIF1 KO H9 hESCs,  $n = 21799$  in RIF1 KO HCT116). i,  
596 Immunoblot of H3K27ac in WT and RIF1 KO H9 hESCs at three dilutions. Ponceau S total  
597 protein stain shown as loading control.

598

599 **Fig. S6. Intra B compartment interactions are strengthened and intra A compartment**  
600 **interactions are weakened in RIF1 KO cells.**

601 a, 2-D histogram of PC1 eigenvector values of diffHi-C points of downregulated (left) and  
602 upregulated (right) Hi-C interactions in H9 hESCs. b, 2-D histogram of PC1 eigenvector values  
603 of diffHi-C points of downregulated (left) and upregulated (right) Hi-C interactions in HCT116  
604 cells.

605

606 **Fig. S7. TAD positions are maintained, and boundaries are strengthened in RIF1 KO**  
607 **cells.**

608 a, ICE normalized region at Chr2 75.2-85.45 Mb showing a TAD boundary formation at a region  
609 of RT and H3K9me3 change in HCT116. WT RIF1 Cut&Run shown for comparison to RT and  
610 H3K9me3 ChIP-seq. Black dotted line indicates TAD boundary in WT cells. Green dotted line  
611 indicates new TAD boundary in RIF1 KO cells. b,  $\text{Log}_2(\text{obs}/\text{exp})$  interaction pile ups centered at

612 WT and RIF1 KO specific TAD boundaries  $\pm 1$  Mb in WT and RIF1 KO HCT116 (left). RT indices  
613 of WT and RIF1 KO specific TAD boundaries in WT and RIF1 KO HCT116 (right). c,  
614 Autocorrelation (y-axis) against lag (x-axis) of insulation scores for unaffected and affected  
615 regions in HCT116 WT and RIF1KO. Higher autocorrelation indicates more similarity between  
616 insulation scores within the region of interest, therefore fewer boundaries where insulation score  
617 increases. Lower autocorrelation indicates more dissimilarity, therefore potentially more  
618 boundaries. d, Insulation score pile ups centered on all TAD boundaries genome wide  $\pm 1$  Mb in  
619 WT and RIF1 KO H9 hESCs and HCT116. Line plots represent mean scores in WT (black) and  
620 RIF1 KO (red). e,  $\text{Log}_2(\text{obs}/\text{exp})$  interaction pile ups centered on TAD boundary  $\pm 1$  Mb in WT  
621 and RIF1 KO H9 hESCs and HCT116. f,  $\text{Log}_2(\text{obs}/\text{exp})$  interaction pile ups centered on TAD  
622 center  $\pm 1$  Mb in WT and RIF1 KO H9 hESCs and HCT116. g, Boxplots of  $\text{log}_2(\text{intra}/\text{interTAD}$   
623 interactions) of A compartment TADs (blue) and B compartment TADs (grey) in WT and RIF1  
624 KO H9 hESCs and HCT116.

625

626 **Fig. S8. TAD boundary strengthening is not caused by changes in Rad21 binding in RIF1**  
627 **KO cells.**

628 a, Scatterplots of Rad21 ChIP-seq peak read counts in WT (x axis) versus RIF1 KO (y axis).  
629 Significant up or down regulated peaks are those with at least 2-fold difference and a FDR <  
630 0.05. Common peaks colored in black, upregulated peaks colored in green, and downregulated  
631 peaks colored in cyan. b,  $\text{Log}_2(\text{obs}/\text{exp})$  interaction pile ups centered at Rad21 peaks that are  
632 common (top), downregulated (middle), or upregulated (bottom)  $\pm 600\text{kb}$  between WT and RIF1  
633 KO cells in HCT116 (left) and H9 hESCs (right).

634

635 **Fig. S9. Histone modifications, not RT or compartments, correlate with gene expression**  
636 **alterations in RIF1 KO.**

637 a, Volcano plots of gene expression changes upon RIF1 KO in H9 hESC (left) and HCT116  
638 (right). Gene expression changes with a corrected p value < 0.1 were called as differential  
639 expression events (up-regulated genes: red, down-regulated genes: green, genes with non-  
640 significant changes: grey). b, GO analysis dot plot of differentially expressed genes in RIF1 KO  
641 H9 hESCs and HCT116 where the sizes of dots are proportional to the number of genes and  
642 the color coding indicates the direction of expression change (red = activated, blue =  
643 repressed). c, Heat maps of regularized  $\text{log}_2(\text{count}) - \text{regularized } \text{log}_2(\text{mean})$  of all genes in WT  
644 and two RIF1 KO clones in both cell lines. Top row contains significantly upregulated genes.  
645 Middle row contains significantly downregulated genes. Bottom row contains genes with no

646 significant expression change. Genes in all rows are ranked by relative expression in WT cells.  
647 Positions of key pluripotency factors (blue text) and histone modification writers (black text) are  
648 indicated. d, Scatterplots of upregulated (red) and downregulated (green) gene RT values in WT  
649 (x axis) and RIF1 KO (y axis) H9 hESCs and HCT116. e, Scatterplot of upregulated (red) and  
650 downregulated (green) gene PC1 eigenvector values in WT (x axis) and RIF1 KO (y axis) H9  
651 hESCs and HCT116. f, Box plots of distribution of WT RT values at down (green) and up (red)  
652 regulated genes in both cell lines. Each point represents an individual gene. g, Box plots of  
653 distribution of WT PC1 eigenvector values at down (green) and up (red) regulated genes in both  
654 cell lines. Each point represents an individual gene. h, Fold enrichment pile up line plots of  
655 indicated histone modification  $\pm 5$ kb around TSS of either up (right) or down (left) regulated  
656 genes in WT (black) and RIF1 KO (blue) H9 hESCs and HCT116. i, Feature importance of  
657 random forest regression modelling of histone modification in predicting direction of for gene  
658 expression changes in H9 hESCs.

659

## 660 **Materials and Methods**

661 **Cell lines:** H9 hESCs were grown in feeder free conditions on Geltrex matrix (Thermo Fisher  
662 A14133) coated dishes in StemPro (Thermo Fisher A100701) media according to  
663 manufacturer's specifications. hESCs were passaged with ReLeSR (StemCell Technologies  
664 05872) according to manufacturer's specifications. RIF1 KO H9 lines were established by  
665 transfecting two CRISPR/Cas9 plasmids containing separate sgRNAs that would cut upstream  
666 and downstream of RIF1 exon 2. Cells were subcloned and screened by PCR for loss of  
667 amplification from exon 2. HCT116 cells were grown in McCoy's 5A media plus 10% FBS and  
668 1% Pen/Strep. HCT116 lines were established by CRISPR/Cas9 knock in of eGFP-RIF1-FLOX  
669 construct and blasticidin selection. Selected cells were dissociated to single cells and diluted to  
670 100 cells per 10cm plate and allowed to grow into colonies for 1-2 weeks. Clones with  
671 homozygous integration of the eGFP-RIF1-FLOX construct were screened by PCR. RIF1 was  
672 deleted from HCT116 eGFP-RIF1-FLOX cell lines by transient transfection with pAAV-Ef1a-  
673 mCherry-IRES-Cre (addgene.com Plasmid #55632) and FACS sorting of mCherry positive cells.  
674 Positive cells were dissociated to single cells and diluted to 100 cells per 10cm plate and  
675 allowed to grow into colonies for 1-2 weeks. Clones with homozygous deletion of RIF1 exon3  
676 were screened by PCR. RIF1-mAID-mClover HCT116 cells were established as in (30). HAP1  
677 WT and RIF1 KO cells were purchased from Horizon Discovery (HZGHC000663c010) and  
678 grown in IMDM plus 10% FBS and 1% Pen/Strep according to manufacturer's instructions.

679

680 **RIF1 degradation with AID:** RIF1-mAID-mClover HCT116 cells were incubated with 2ug/mL  
681 doxycycline and 100uM Auxinole (31) for 24 hrs to induce OsTIR1 expression and suppress its  
682 activity. Auxinole was washed away and fresh media plus 2ug/mL doxycycline plus 500 uM IAA  
683 (Sigma I2886) was added for 24hrs to degrade RIF1. Control cells remained in doxycycline and  
684 Auxinole for an additional 24hrs. RIF1 degradation was confirmed by microscopy and western  
685 blotting.

686  
687 **2 fraction RT profiling and analysis:** Genome-wide RT profiles were generated as previously  
688 described (12) with the following modifications: RT datasets were not normalized by quantile  
689 normalization since this processing step will result in the enforcement of WT distribution on KO,  
690 thereby preventing the detection of any genome-wide RT changes. The Loess smoothed  
691 coverages are scaled using robust scaler from the python package scikit-learn ([http://scikit-](http://scikit-learn.org)  
692 [learn.org](http://scikit-learn.org)) instead. The scaler removes median and scales the datasets to their collective inter-  
693 quantile range according to:

$$\text{xscaled}=(\text{x}-\text{median}(\text{x}))/\text{x.quantile}(0.75)-\text{x.quantile}(0.25)$$

694  
695  
696  
697 (equation 1)

698  
699 As a result, different datasets with varying dynamic ranges directly comparable to each other.  
700 Sex chromosomes were excluded from Repli-seq analysis.

701  
702 **Replication foci staining:** Asynchronous cells were grown on coverslips until 70% confluence  
703 and pulsed with BrdU for 30 minutes. Cells were then washed with PBS and fixed in cold 70%  
704 EtOH. Chromatin was denatured with 1.5 N HCl 30min RT and washed away. Cells were  
705 permeabilized with PBS plus 0.5% Tween20 for 5min RT. Mouse anti-BrdU (BD 55567) (1:50) in  
706 PBS plus 10% goat serum was added for 1hr at RT and washed away. Goat 488 anti-mouse  
707 (1:100) in PBS plus 10% goat serum was added for 1hr at RT and washed away. Nuclei were  
708 stained with DAPI and cells were imaged on the DeltaVision (GE Life Sciences) microscope.  
709 Patterns were categorized as early, middle, late, or blended as in Extended Data Fig 3a.

710  
711 **High resolution RT profiling and analysis:** High resolution Repli-seq was performed and  
712 analyzed as previously described (14). Briefly, asynchronously growing cells were labeled with  
713 BrdU (400 uM) for 30 minutes followed by ethanol fixation. PI staining for DNA content was

714 carried out and 16 fractions of S phase were sorted on the FACS. Gates were set by marking  
715 G1 and G2 peaks and dividing S phase into 16 equal fractions between the peaks. At least 80k  
716 cells were sorted for each S phase fraction. BrdU incorporated mouse mitochondrial DNA and  
717 BrdU negative mouse DNA was spiked into the purified genomic DNA to serve as a BrdU  
718 immunoprecipitation control. BrdU incorporated DNA was immunoprecipitated using mouse anti-  
719 BrdU (BD 55567). Libraries were prepared for Illumina sequencing with NEBNext Ultra DNA  
720 Library Prep Kit for Illumina (E7370). The reads were aligned to hg38 using bowtie2 with  
721 parameters --no-mixed --no-discordant --reorder. Replication heatmap matrices were  
722 constructed from RPM (read per million) bedgraph files at 50kb window size ranked from S1 to  
723 S16. The matrices were Gaussian smoothed with lambda=1 and column-wise scaled. Sex  
724 chromosomes were excluded from the heatmap matrix construction.

725

726 **Calculating RT indices from high resolution Repli-seq:** For each 50kb genomic bin the RT  
727 indices computed according to the equation below and graphically illustrated in Supplementary  
728 Figure 4b:

$$729 \quad \text{RTindex} = \log_2(\text{Sum}(S1*8, S2*7, S3*6, \dots, S8*1) / \text{Sum}(S9*1, S10*2, S11*3 \dots S16*8))$$

730 (equation II)

731  $RT_{\text{diff}}$  is computed by subtracting  $RT_{\text{index}_{\text{KO}}}$  from  $RT_{\text{index}_{\text{WT}}}$ .

732 **Calling unaffected and affected regions using high resolution Repli-seq:** We fitted a  
733 Gaussian Mixture model probability distribution on  $RT_{\text{diff}}$  between WT and KO calculated for all  
734 genomic bins. The model is composed of three distribution components: one that contains large  
735 negative values representing the bins that on a population level replicate later in WT and earlier  
736 in KO, a second distribution of positive values representing bins that on a population level  
737 replicate earlier in WT and later in KO, a third one that contains values close to zero  
738 representing the bins that on a population level replicate at times statistically indistinguishable  
739 from WT. The validity of the model is checked through the minimization of Bayesian information  
740 criterion. Continuous 50kb genomic bins that were associated with negative RT indices in WT  
741 and assigned to the first distribution were called as affected late regions. Continuous 50kb

742 genomic bins that were associated with negative RT indices in WT but assigned to the third  
743 distribution were called as unaffected late regions.

744 **T<sub>width</sub> from high resolution Repli-seq:** The degree of heterogeneity of RT was estimated by  
745 performing a sigmoidal fitting on the column wise cumulative replication percentage as  
746 previously described (14). Briefly, the sigmoidal function below:

$$f(x) = \frac{e^{-kx}}{1 + e^{-kx}}$$

747

748 (equation III)

749

750 was fitted to bin-wise cumulative replication percentage using curve\_fit function in scipy, which  
751 aims to minimize the mean squared error. Tolerance is set at 0.0001. T<sub>rep</sub> used in the timing-  
752 variation measurement is f(x) when x = 0.5 which means the genomic bin is 50% replicated in  
753 the cell population and T<sub>width</sub> used in the timing-variation measurement is f(0.75) – f(0.25) which is  
754 the time difference between 75% replicated and 25% replicated for any genomic bin.

755

756 **Single cell Repli-seq:** Single cell RT was performed as previously described (15) with slight  
757 modifications. Briefly, single cells were sorted from five evenly spaced windows throughout S  
758 phase directly into individual wells of a 96 well plate containing single cell lysis buffer and lysed  
759 at 50°C for 1 hour followed by 4 minutes at 99°C. Whole genome amplification (WGA) was  
760 performed as previously described (32) and unique barcodes were added to each individual  
761 WGA product followed by purification and pooling for NEBNext Ultra DNA Library preparation.

762

763 **Single cell Repli-seq analysis:** Single cell Repli-seq fastqs were first demultiplexed according  
764 to the barcodes added during library making using custom script. The reads were trimmed  
765 100bp from the 5' end using CutAdapt (<https://github.com/marcelm/cutadapt>) and subsequently  
766 aligned to hg38 using bowtie2 with the parameters --no-mixed --no-discordant --reorder. Cells  
767 with fewer than 250,000 reads aligned were filtered out. Subsequent analysis was carried out as  
768 previously described (15). Briefly, mappability correction using G1 cells and smoothing were  
769 applied to RPM was calculated in 50kb bins for single cells. Binarization was subsequently

770 carried out on smoothed RPM signal files by applying a 2-component mixed Gaussian model  
771 where bins assigned to the distribution with lower mean RPM were binarized to 0 (unreplicated)  
772 and those that were assigned to the distribution with higher mean RPM were binarized to 1  
773 (replicated). Heatmaps were generated by sorting according to copy number with the cell with  
774 the fewest bins replicated at the top and that with the most bins replicated at the bottom.  $T_{width}$   
775 calculation was performed as previously described (15). Briefly, for individual bins, an index  
776 called ‘time from population average replication’ was calculated, which represents the time in  
777 hours passed from the time of replication indicated from E/L repli-seq. A negative number  
778 indicates that according to E/L repli-seq the genomic bin should not have undergone replication  
779 on a population level whereas a positive number indicates that according to E/L repli-seq the bin  
780 should have finished replicating. The 2-D distributions of such indices against % replicated were  
781 plotted as heatmaps. A sigmoidal curve was fitted to the distribution as described above in  
782 ‘Twidth from high resolution Repli-Seq’.

783  
784 **ChIP-seq experiments and analyses:** ChIP-seq experiments in HCT116 cells and H9 hESCs  
785 were carried out as previously described (33). After removal of medium, cells were crosslinked  
786 in 1% formaldehyde in PBS at room temperature for 10 min and quenched with glycine. PBS  
787 rinsed cell pellets were flash frozen in liquid nitrogen and stored at -80°C or continue with cell  
788 and nuclear lysis steps. Nuclear lysates were precleared with protein A/G beads followed by  
789 incubation with proper antibodies. After washing with high salt buffer, LiCl buffer, and TE,  
790 chromatin was eluted and reverse crosslinked. Purified DNA was ethanol precipitated followed  
791 by Illumina Truseq library preparation. Libraries for Illumina sequencing were constructed using  
792 the following standard protocol. Fragment ends were repaired using the NEBNext End Repair  
793 Module and adenosine was added at the 3' ends of fragments using Klenow fragment (3' to 5'  
794 exo minus, New England Biolabs), universal adaptors were ligated to the A-tailed DNA  
795 fragments at room temperature for 1 h with T4 DNA ligase (New England Biolabs) and amplified  
796 with Illumina barcoded primers using KAPA SYBR FAST qPCR Master Mix for 5~12 PCR cycles  
797 to obtain enough DNA for sequencing. Generated libraries were paired-end sequenced on  
798 Illumina HiSeq2500 v4. ChIP-seq datasets were aligned to hg38 using bowtie-2 with the  
799 parameters --no-mixed --no-discordant --reorder. Resulting bam files for each histone mark  
800 were sorted and deduplicated using samtools. Deduplicated bam tools for ChIPed and input  
801 libraries were passed onto the peak calling algorithm MACS2 for peak calling and generating  
802 fold enrichment signal tracks. The heatmaps centered at features were constructed by filling a



803 matrix where the rows represent individual ChIP-seq fold enrichment signals around individual  
804 features.

805

806 **RIF1 Cut&Run:** Cut&Run was performed as previously described (16) with antibody against  
807 eGFP in eGFP-RIF1 tagged H9 hESCs and HCT116. Briefly, cells were washed and bound to  
808 Concanavalin-A-coated magnetic beads, and permeabilized in wash buffer (20 mM HEPES pH  
809 7.5, 150 mM NaCl, 0.5 mM spermidine and one Roche Complete protein inhibitor tablet per 50  
810 mL) containing 0.03% digitonin and 20 mM EDTA (Dig-wash). Antibody was added to a final  
811 concentration of 1:100 and incubated overnight at 4°C. Cells were washed with Dig-wash buffer  
812 and incubated with Protein-A-MNase (pA-MN) for 1 hour at 4°C. Cells were washed three times  
813 with Dig-wash buffer to remove unbound pA-MN before placing cells in an ice-cold block and  
814 activating cleavage with the addition of CaCl<sub>2</sub> to 2mM final concentration. Cleavage was  
815 stopped by the addition of 2x Stop Buffer (340 mM NaCl, 20 mM EDTA, 4 mM EGTA, 0.05%  
816 Digitonin, 0.05 mg/mL glycogen, 5 µg/mL RNase A), and fragments were released by 30 min  
817 incubation at 37°C. Supernatant was recovered and DNA was purified with phenol:chloroform  
818 extraction and precipitation with ethanol, before being used as input for library preparation.

819

820 **Calling H3K9me3 domains:** In addition to applying MACS2 (34) and epic2 (35) on H3K9me3  
821 ChIP-seq datasets to call peaks, we also called large H3K9me3 domain. H3K9me3 fold  
822 enrichment was calculated as a log<sub>2</sub> ratio over input in 50kb genomic bins. Considering any  
823 genomic bin can assume one of two states: inside or outside of a H3K9me3 domain, a two-state  
824 hidden markov model was fitted to the fold enrichment distribution with tolerance set at 0.0001.  
825 Implementation was carried out in Python using the hmmlearn package  
826 (<https://github.com/hmmlearn/hmmlearn>). Each genomic bin was assigned a state using the  
827 Viterbi algorithm. The state associated with the higher signal mean was inside H3K9me3  
828 domain. H3K9me3 domain was therefore defined as continuous genomic bins associated with  
829 the state of higher mean signal.

830

831 **Hi-C procedure and sequence processing:** Two subclones of H9 and HCT116 RIF1 KO cells  
832 were prepared and processed for Hi-C as previously described (36) using DpnII for digestion.  
833 ~1 billion 50bp paired-end reads were obtained for each subclone for both H9 and HCT116.  
834 Reads were processed using HiCUP pipeline available from Babraham Institute  
835 (<https://www.bioinformatics.babraham.ac.uk>). Briefly the reads were truncated at DpnII  
836 recognition sites and mapped to hg38 using bowtie2. The uniquely mapped reads were further

837 filtered to remove common Hi-C artefacts e.g. self-ligated fragments and same frag and  
838 subsequently deduplicated. Bam files were converted to cooler files using 4DN DCIC utility  
839 bam2pairs and cooler load at 5kb, 50kb, 100kb and 250kb. Hi-C maps used in this work were  
840 either normalized using iterative correction (ICE) (37) or distance normalized as log2  
841 (observed/expected) where expected is computed according to the equation below:  
842

$$\frac{\sum_i^j diagonal(i - j)}{(i - j)}$$

843

844

(Equation IV)

845

846 Eigendecomposition is performed using cooltools package and eigenvectors are ranked using  
847 gene density.

848

849 **TAD calling:** TADs and insulating boundaries in this work were called using DI (22) and  
850 insulation score (38) respectively at 50kb bins with a sliding window of 1Mb.

851

852 **Calling differential interacting pairs:** Differential interacting pairs were called using diffHiC  
853 (21). Briefly, read counts matrices were generated from bam files resulting from HiCUP for WT  
854 and RIF1 KO. Subsequently, edgeR (39) was applied to count matrices to estimate technical  
855 noise between replicates and call differential pairs by quasi-F test through generalized linear  
856 model (glm) fitting. Pairs with  $\geq 2$ -fold difference and  $< 0.05$  FDR were called to be up- or down-  
857 regulated depending on the sign of fold change.

858

859 **RNA-seq:** Libraries were prepared with NEBNext rRNA Depletion kit (human/mouse/rat) and  
860 NEBNext Ultra II Directional RNA Library Prep kit for Illumina (New England Biolabs)  
861 according to manufacturer's instructions. Sample input was 900ng total RNA (determined by  
862 Qubit RNA HS reagents, Thermo) with a RIN  $> 8$  (TapeStation High Sensitivity RNA ScreenTape  
863 Assay, Agilent). RNA was fragmented for 15 minutes and libraries were constructed with a 1/5th  
864 dilution of NEB adaptor and 12 cycles of PCR amplification with dual-indexing primers.  
865 Amplified libraries were initially quantified by Qubit DNA HS reagents and checked for size and  
866 artifacts using TapeStation DNA HS reagents. Excess adaptors were removed using an  
867 additional 0.9x AMPure bead purification. KAPA qPCR (KAPA Biosystems) was used to

868 determine molar quantities of each library and individual libraries were diluted and pooled at  
869 equimolar concentrations. The final library pool was again checked by TapeStation and KAPA  
870 qPCR before submission for sequencing. Fastq reads were aligned to hg38 using STAR aligner  
871 with the options --quantMode GeneCounts and --bamRemoveDuplicatesType UniqueIdentical  
872 turned on. Gene count files were generated using HTseq ([https://github.com/simon-](https://github.com/simon-anders/htseq)  
873 [anders/htseq](https://github.com/simon-anders/htseq)) from bam files produced by STAR aligner. DEseq2  
874 (<https://bioconductor.org/packages/release/bioc/html/DESeq2.html>) was subsequently used to  
875 call differentially expressed transcripts using gene count files as input.

876

877 **Random Forest Classifier:** Random forest classification for differentially expressed genes was  
878 performed on arrays where each row represented the TSS of a differentially expressed gene  
879 and each column represented the RPM signal of H3K27ac, H3K4me3, H3K27me3 and  
880 H3K9me3 according to the algorithm presented in (40) using scikit-learn.

881

882 Reference:

- 883 1. N. Rhind, D. M. Gilbert, DNA Replication Timing. *Cold Spring Harb. Perspect. Biol.* **5**,  
884 a010132 (2013).
- 885 2. C. Marchal, J. Sima, D. M. Gilbert, Control of DNA replication timing in the 3D genome.  
886 *Nat. Rev. Mol. Cell Biol.* (2019), , doi:10.1038/s41580-019-0162-y.
- 887 3. N. Reverón-Gómez, C. González-Aguilera, K. R. Stewart-Morgan, N. Petryk, V. Flury, S.  
888 Graziano, J. V. Johansen, J. S. Jakobsen, C. Alabert, A. Groth, Accurate Recycling of  
889 Parental Histones Reproduces the Histone Modification Landscape during DNA  
890 Replication. *Mol. Cell* (2018), doi:10.1016/j.molcel.2018.08.010.
- 891 4. T. M. Escobar, O. Oksuz, R. Saldaña-Meyer, N. Descostes, R. Bonasio, D. Reinberg,  
892 Active and Repressed Chromatin Domains Exhibit Distinct Nucleosome Segregation  
893 during DNA Replication. *Cell* (2019), doi:10.1016/j.cell.2019.10.009.
- 894 5. L. Lande-Diner, J. Zhang, H. Cedar, Shifts in Replication Timing Actively Affect Histone  
895 Acetylation during Nucleosome Reassembly. *Mol. Cell.* **34**, 767–74 (2009).
- 896 6. M. Hayano, Y. Kanoh, S. Matsumoto, C. Renard-Guillet, K. Shirahige, H. Masai, Rif1 is a  
897 global regulator of timing of replication origin firing in fission yeast. *Genes Dev.* **26**, 137–  
898 150 (2012).
- 899 7. J. M. Peace, A. Ter-Zakarian, O. M. Aparicio, Rif1 regulates initiation timing of late  
900 replication origins throughout the *S. cerevisiae* genome. *PLoS One.* **9** (2014),  
901 doi:10.1371/journal.pone.0098501.

- 902 8. D. Cornacchia, V. Dileep, J.-P. P. Quivy, R. Foti, F. Tili, R. Santarella-Mellwig, C. Antony,  
903 G. G. Almouzni, D. M. Gilbert, S. B. C. C. Buonomo, Mouse Rif1 is a key regulator of the  
904 replication-timing programme in mammalian cells. *EMBO J.* **31**, 3678–3690 (2012).
- 905 9. S. Yamazaki, A. Ishii, Y. Kanoh, M. Oda, Y. Nishito, H. Masai, Rif1 regulates the  
906 replication timing domains on the human genome. *EMBO J.* **31**, 3667–3677 (2012).
- 907 10. E. Sreesankar, V. Bharathi, R. K. Mishra, K. Mishra, Drosophila Rif1 is an essential gene  
908 and controls late developmental events by direct interaction with PP1-87B. *Sci. Rep.* **5**,  
909 10679 (2015).
- 910 11. R. Foti, S. Gnan, D. Cornacchia, V. Dileep, A. Bulut-Karslioglu, S. Diehl, A. Bunes, F. A.  
911 A. Klein, W. Huber, E. Johnstone, R. Loos, P. Bertone, D. M. M. Gilbert, T. Manke, T.  
912 Jenuwein, S. C. B. C. B. B. Buonomo, Nuclear Architecture Organized by Rif1 Underpins  
913 the Replication-Timing Program. *Mol. Cell.* **61**, 260–273 (2016).
- 914 12. C. Marchal, T. Sasaki, D. Vera, K. Wilson, J. Sima, J. C. Rivera-Mulia, C. Trevilla-García,  
915 C. Nogues, E. Nafie, D. M. Gilbert, Genome-wide analysis of replication timing by next-  
916 generation sequencing with E/L Repli-seq. *Nat. Protoc.* **13**, 819–839 (2018).
- 917 13. R. T. O’Keefe, S. C. Henderson, D. L. Spector, Dynamic organization of DNA replication  
918 in mammalian cell nuclei: spatially and temporally defined replication of chromosome-  
919 specific alpha-satellite DNA sequences. *J. Cell Biol.* **116**, 1095–1110 (1992).
- 920 14. P. A. Zhao, T. Sasaki, D. M. Gilbert, High Resolution Mapping of the Temporal  
921 Replication Landscape of the Human and Mouse Genome. *bioRxiv*, 755629 (2019).
- 922 15. V. Dileep, D. M. Gilbert, Single-cell replication profiling to measure stochastic variation in  
923 mammalian replication timing. *Nat. Commun.* **9**, 427 (2018).
- 924 16. P. J. Skene, S. Henikoff, An efficient targeted nuclease strategy for high-resolution  
925 mapping of DNA binding sites. *Elife* (2017), doi:10.7554/elife.21856.
- 926 17. D. Nicetto, K. S. Zaret, Role of H3K9me3 heterochromatin in cell identity establishment  
927 and maintenance. *Curr. Opin. Genet. Dev.* **55**, 1–10 (2019).
- 928 18. T. Ryba, I. Hiratani, J. Lu, M. Itoh, M. Kulik, J. Zhang, T. C. Schulz, A. J. Robins, S.  
929 Dalton, D. M. Gilbert, Evolutionarily conserved replication timing profiles predict long-  
930 range chromatin interactions and distinguish closely related cell types. *Genome Res.* **20**,  
931 761–770 (2010).
- 932 19. E. Yaffe, S. Farkash-Amar, A. Polten, Z. Yakhini, A. Tanay, I. Simon, Comparative  
933 analysis of DNA replication timing reveals conserved large-scale chromosomal  
934 architecture. *PLoS Genet.* **6**, 1–12 (2010).
- 935 20. E. Lieberman-Aiden, N. L. Van Berkum, L. Williams, M. Imakaev, T. Ragoczy, A. Telling,

- 936 I. Amit, B. R. Lajoie, P. J. Sabo, M. O. Dorschner, R. Sandstrom, B. Bernstein, M. A.  
937 Bender, M. Groudine, A. Gnirke, J. Stamatoyannopoulos, L. A. Mirny, E. S. Lander, J.  
938 Dekker, Comprehensive mapping of long-range interactions reveals folding principles of  
939 the human genome. *Science* (80-. ). (2009), doi:10.1126/science.1181369.
- 940 21. A. T. L. Lun, G. K. Smyth, diffHic: A Bioconductor package to detect differential genomic  
941 interactions in Hi-C data. *BMC Bioinformatics* (2015), doi:10.1186/s12859-015-0683-0.
- 942 22. J. R. Dixon, S. Selvaraj, F. Yue, A. Kim, Y. Li, Y. Shen, M. Hu, J. S. Liu, B. Ren,  
943 Topological domains in mammalian genomes identified by analysis of chromatin  
944 interactions. *Nature*. **485**, 376–380 (2012).
- 945 23. J. Sima, A. Chakraborty, V. Dileep, M. Michalski, K. N. Klein, N. P. Holcomb, J. L. Turner,  
946 M. T. Paulsen, J. C. Rivera-Mulia, C. Trevilla-Garcia, D. A. Bartlett, P. A. Zhao, B. K.  
947 Washburn, E. P. Nora, K. Kraft, S. Mundlos, B. G. Bruneau, M. Ljungman, P. Fraser, F.  
948 Ay, D. M. Gilbert, Identifying cis Elements for Spatiotemporal Control of Mammalian DNA  
949 Replication. *Cell*. **176**, 816–830 (2019).
- 950 24. P. Oldach, C. A. Nieduszynski, Cohesin-Mediated Genome Architecture Does Not Define  
951 DNA Replication Timing Domains. *Genes (Basel)*. **10**, 196 (2019).
- 952 25. M. Cremer, K. Brandstetter, A. Maiser, S. S. P. Rao, V. Schmid, N. Mitra, S. Mamberti,  
953 K.-N. Klein, D. M. Gilbert, H. Leonhardt, M. C. Cardoso, E. L. Aiden, H. Harz, T. Cremer,  
954 Cohesin depleted cells pass through mitosis and reconstitute a functional nuclear  
955 architecture. *bioRxiv*, 816611 (2019).
- 956 26. A. Burton, M. E. Torres-Padilla, Epigenetic reprogramming and development: A unique  
957 heterochromatin organization in the preimplantation mouse embryo. *Brief. Funct.*  
958 *Genomics* (2010), doi:10.1093/bfgp/elq027.
- 959 27. R. Strauss, P. Hamerlik, A. Lieber, J. Bartek, Regulation of stem cell plasticity:  
960 Mechanisms and relevance to tissue biology and cancer. *Mol. Ther.* (2012), ,  
961 doi:10.1038/mt.2012.2.
- 962 28. K. Nishimura, T. Fukagawa, H. Takisawa, T. Kakimoto, M. Kanemaki, An auxin-based  
963 degron system for the rapid depletion of proteins in nonplant cells. *Nat. Methods*. **6**, 917–  
964 922 (2009).
- 965 29. S. B. C. Buonomo, Y. Wu, D. Ferguson, T. de Lange, Mammalian Rif1 contributes to  
966 replication stress survival and homology-directed repair. *J. Cell Biol.* **187**, 385–98 (2009).
- 967 30. L. P. Watts, T. Natsume, Y. Saito, J. Garzón, M. T. Kanemaki, S. Hiraga, A. D.  
968 Donaldson, The RIF1-Long splice variant promotes G1 phase 53BP1 nuclear bodies to  
969 protect against replication stress. *bioRxiv*, 859199 (2019).

- 970 31. A. Yesbolatova, T. Natsume, K. ichiro Hayashi, M. T. Kanemaki, Generation of  
971 conditional auxin-inducible degron (AID) cells and tight control of degron-fused proteins  
972 using the degradation inhibitor auxinole. *Methods*. **164–165**, 73–80 (2019).
- 973 32. T. Baslan, J. Kendall, L. Rodgers, H. Cox, M. Riggs, A. Stepansky, J. Troge, K. Ravi, D.  
974 Esposito, B. Lakshmi, M. Wigler, N. Navin, J. Hicks, Genome-wide copy number analysis  
975 of single cells. *Nat. Protoc.* **7**, 1024–1041 (2012).
- 976 33. X. Lyu, M. J. Rowley, V. G. Corces, Architectural Proteins and Pluripotency Factors  
977 Cooperate to Orchestrate the Transcriptional Response of hESCs to Temperature Stress.  
978 *Mol. Cell.* **71**, 940-955.e7 (2018).
- 979 34. Y. Zhang, T. Liu, C. A. Meyer, J. Eeckhoute, D. S. Johnson, B. E. Bernstein, C.  
980 Nussbaum, R. M. Myers, M. Brown, W. Li, X. S. Shirley, Model-based analysis of ChIP-  
981 Seq (MACS). *Genome Biol.* (2008), doi:10.1186/gb-2008-9-9-r137.
- 982 35. E. B. Stovner, P. Sætrom, epic2 efficiently finds diffuse domains in ChIP-seq data.  
983 *Bioinformatics* (2019), doi:10.1093/bioinformatics/btz232.
- 984 36. S. S. P. Rao, M. H. Huntley, N. C. Durand, E. K. Stamenova, I. D. Bochkov, J. T.  
985 Robinson, A. L. Sanborn, I. Machol, A. D. Omer, E. S. Lander, E. L. L. Aiden, A 3D map  
986 of the human genome at kilobase resolution reveals principles of chromatin looping. *Cell.*  
987 **159**, 1665–1680 (2014).
- 988 37. M. Imakaev, G. Fudenberg, R. P. McCord, N. Naumova, A. Goloborodko, B. R. Lajoie, J.  
989 Dekker, L. A. Mirny, Iterative correction of Hi-C data reveals hallmarks of chromosome  
990 organization. *Nat. Methods* (2012), doi:10.1038/nmeth.2148.
- 991 38. B. R. Lajoie, J. Dekker, N. Kaplan, The Hitchhiker's guide to Hi-C analysis: Practical  
992 guidelines. *Methods* (2015), doi:10.1016/j.ymeth.2014.10.031.
- 993 39. M. D. Robinson, D. J. McCarthy, G. K. Smyth, edgeR: A Bioconductor package for  
994 differential expression analysis of digital gene expression data. *Bioinformatics* (2009),  
995 doi:10.1093/bioinformatics/btp616.
- 996 40. L. Breiman, Random forests. *Mach. Learn.* **45**, 5–32 (2001).
- 997
- 998

# Figure 1

**a**

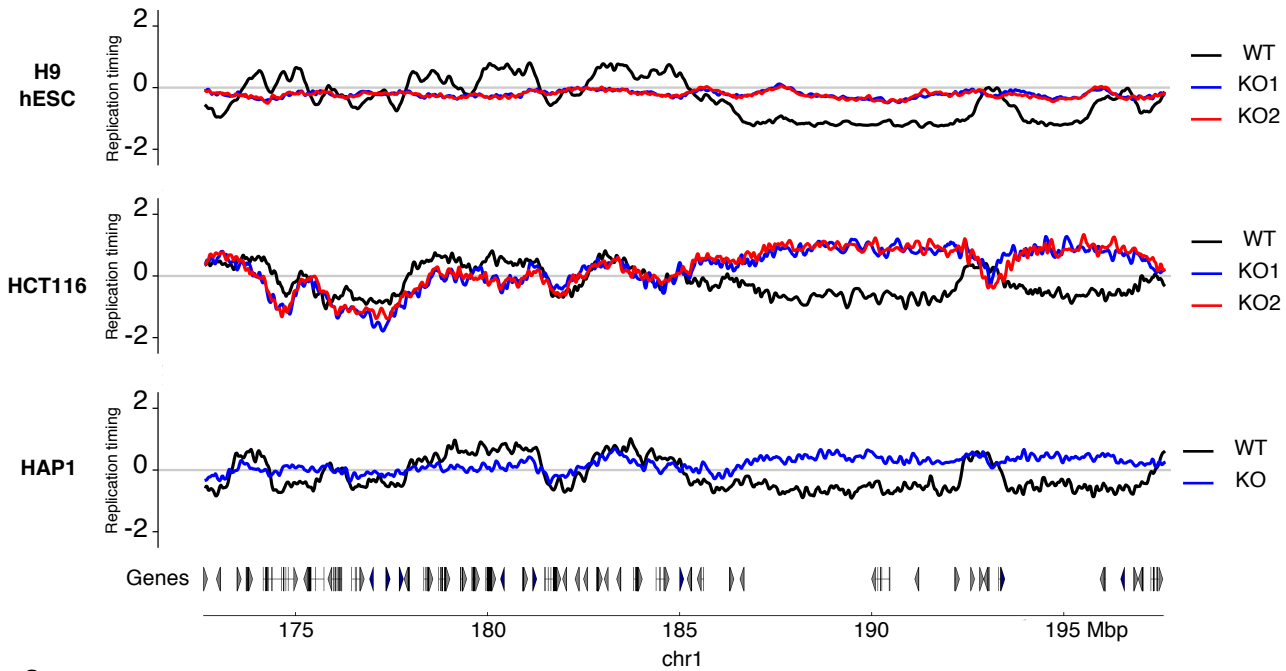

**c**

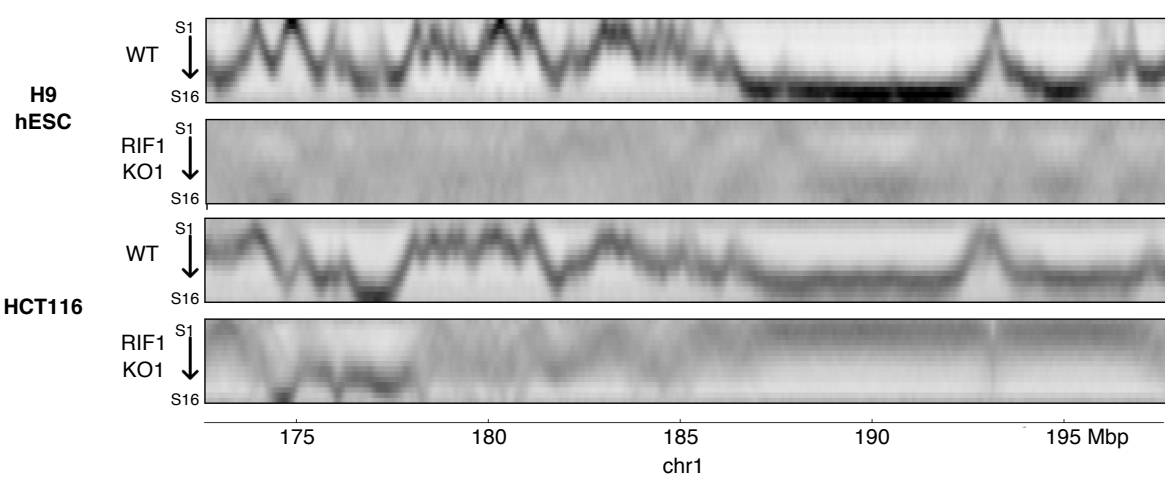

**b**

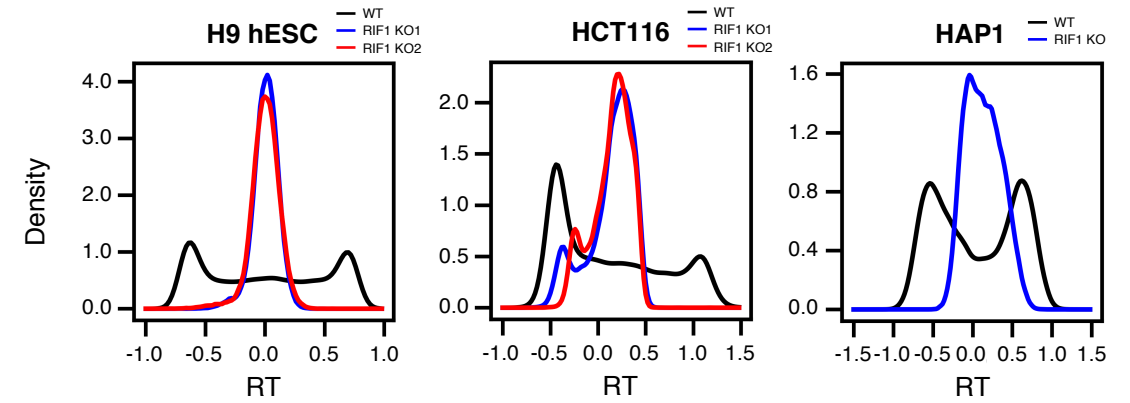

**d**

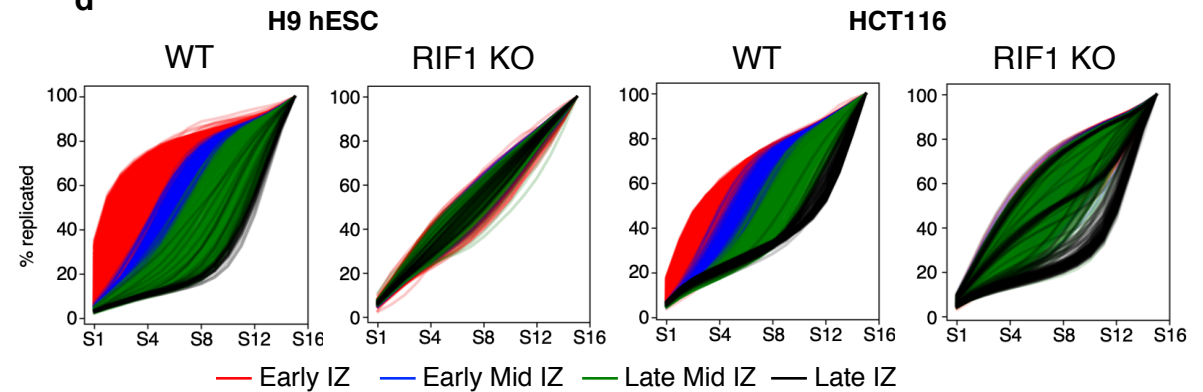

**e**

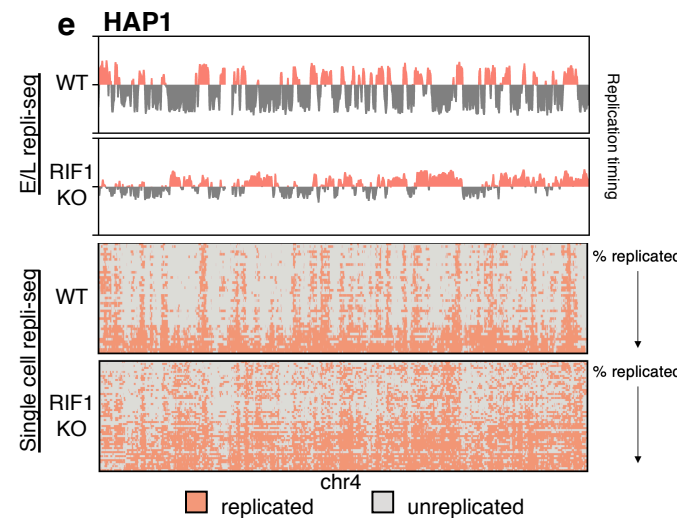

**f**

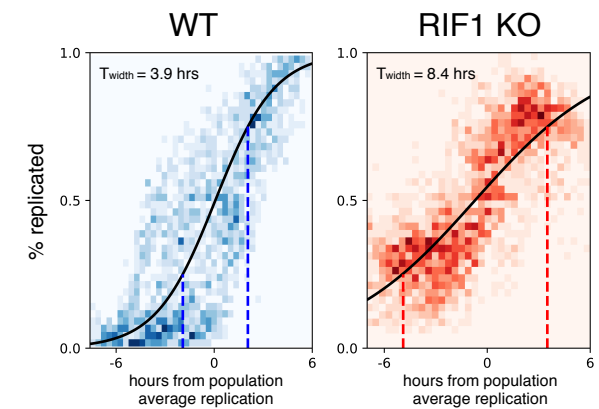

**Figure 2**

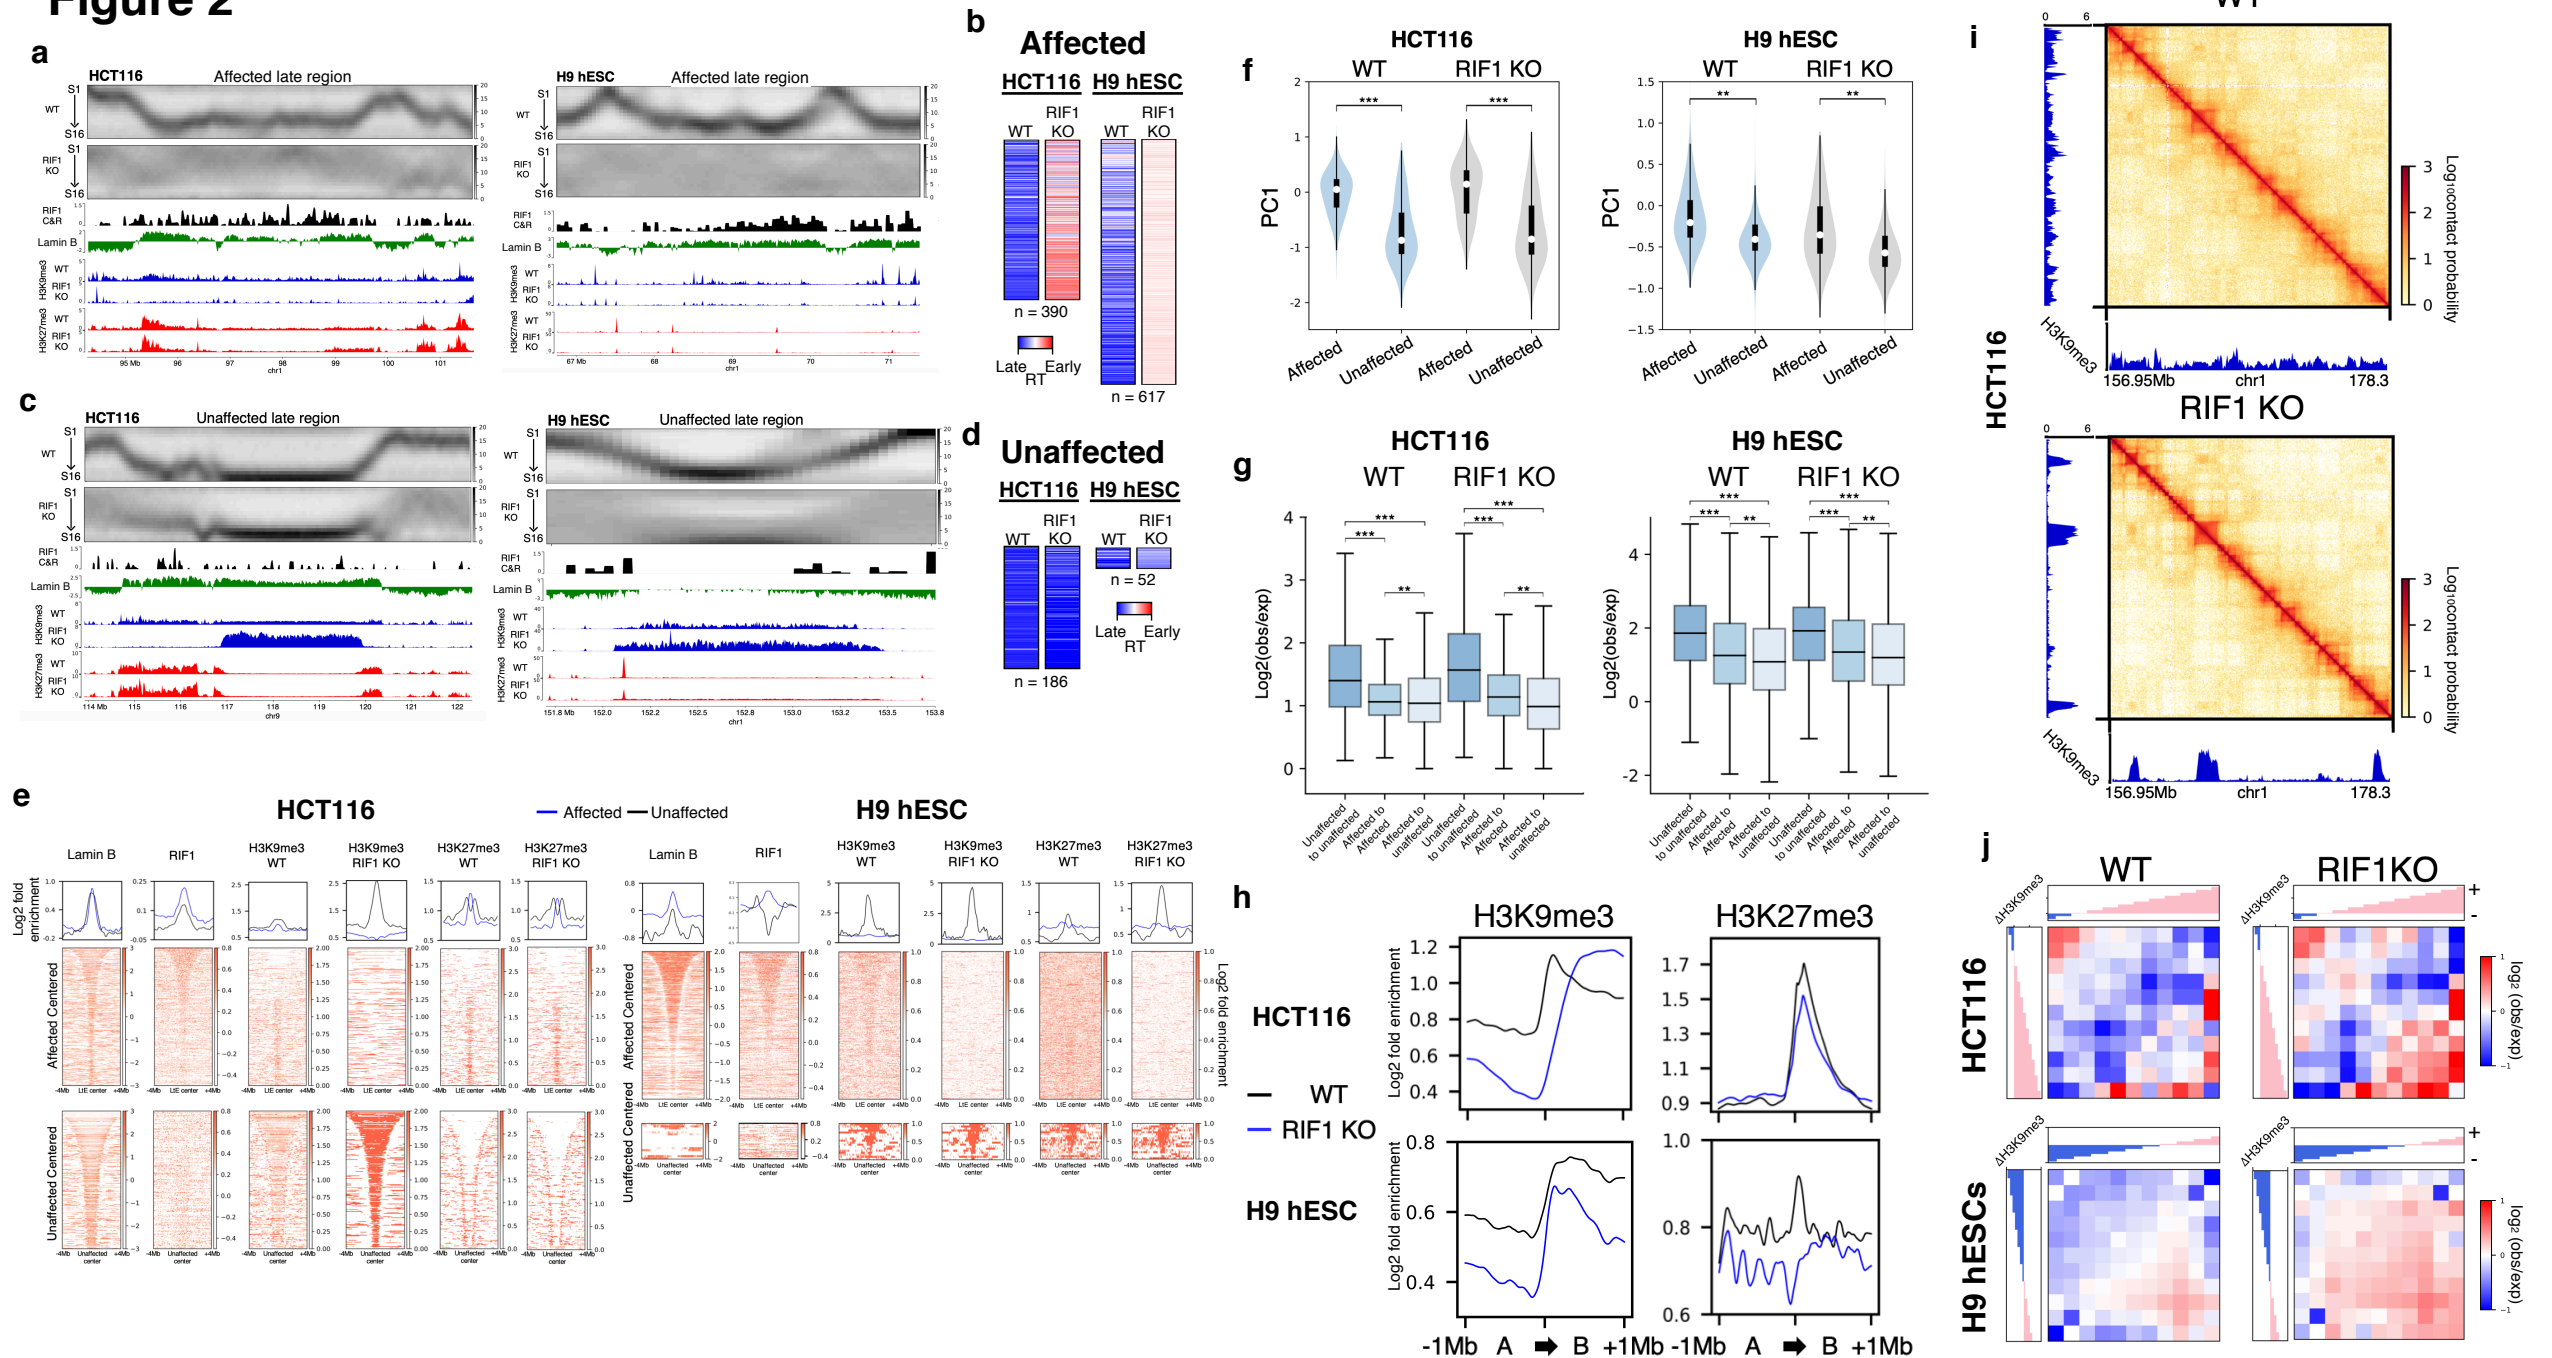



**Figure 3**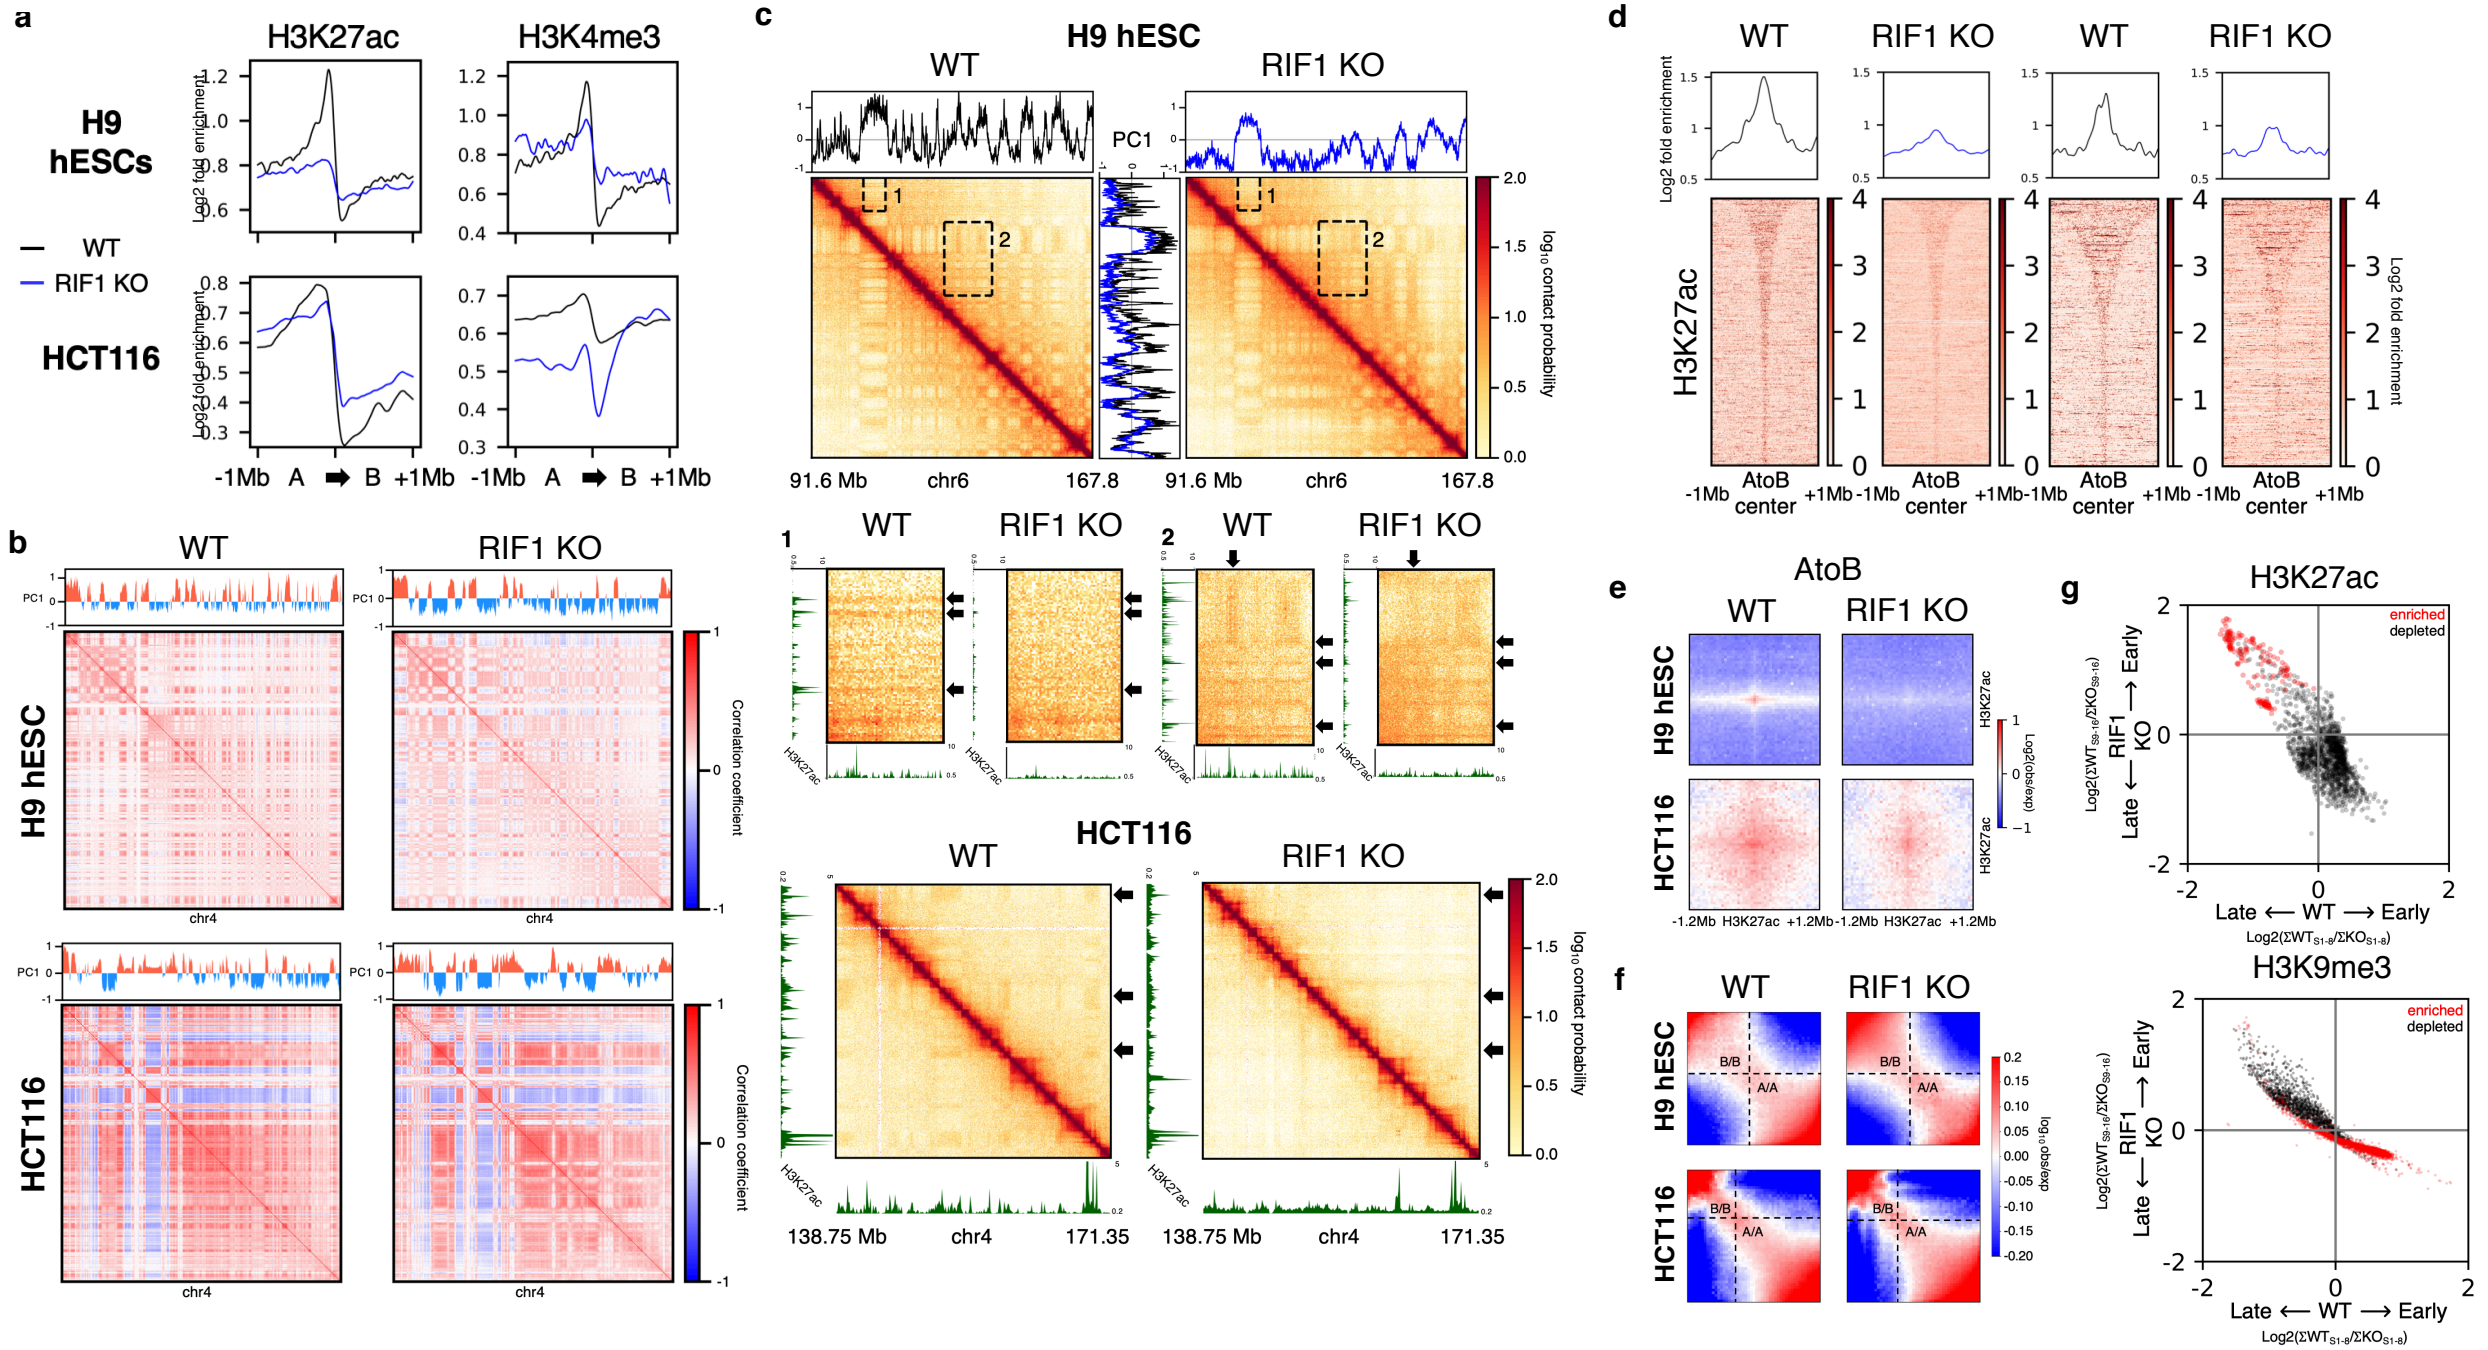

**Figure 4**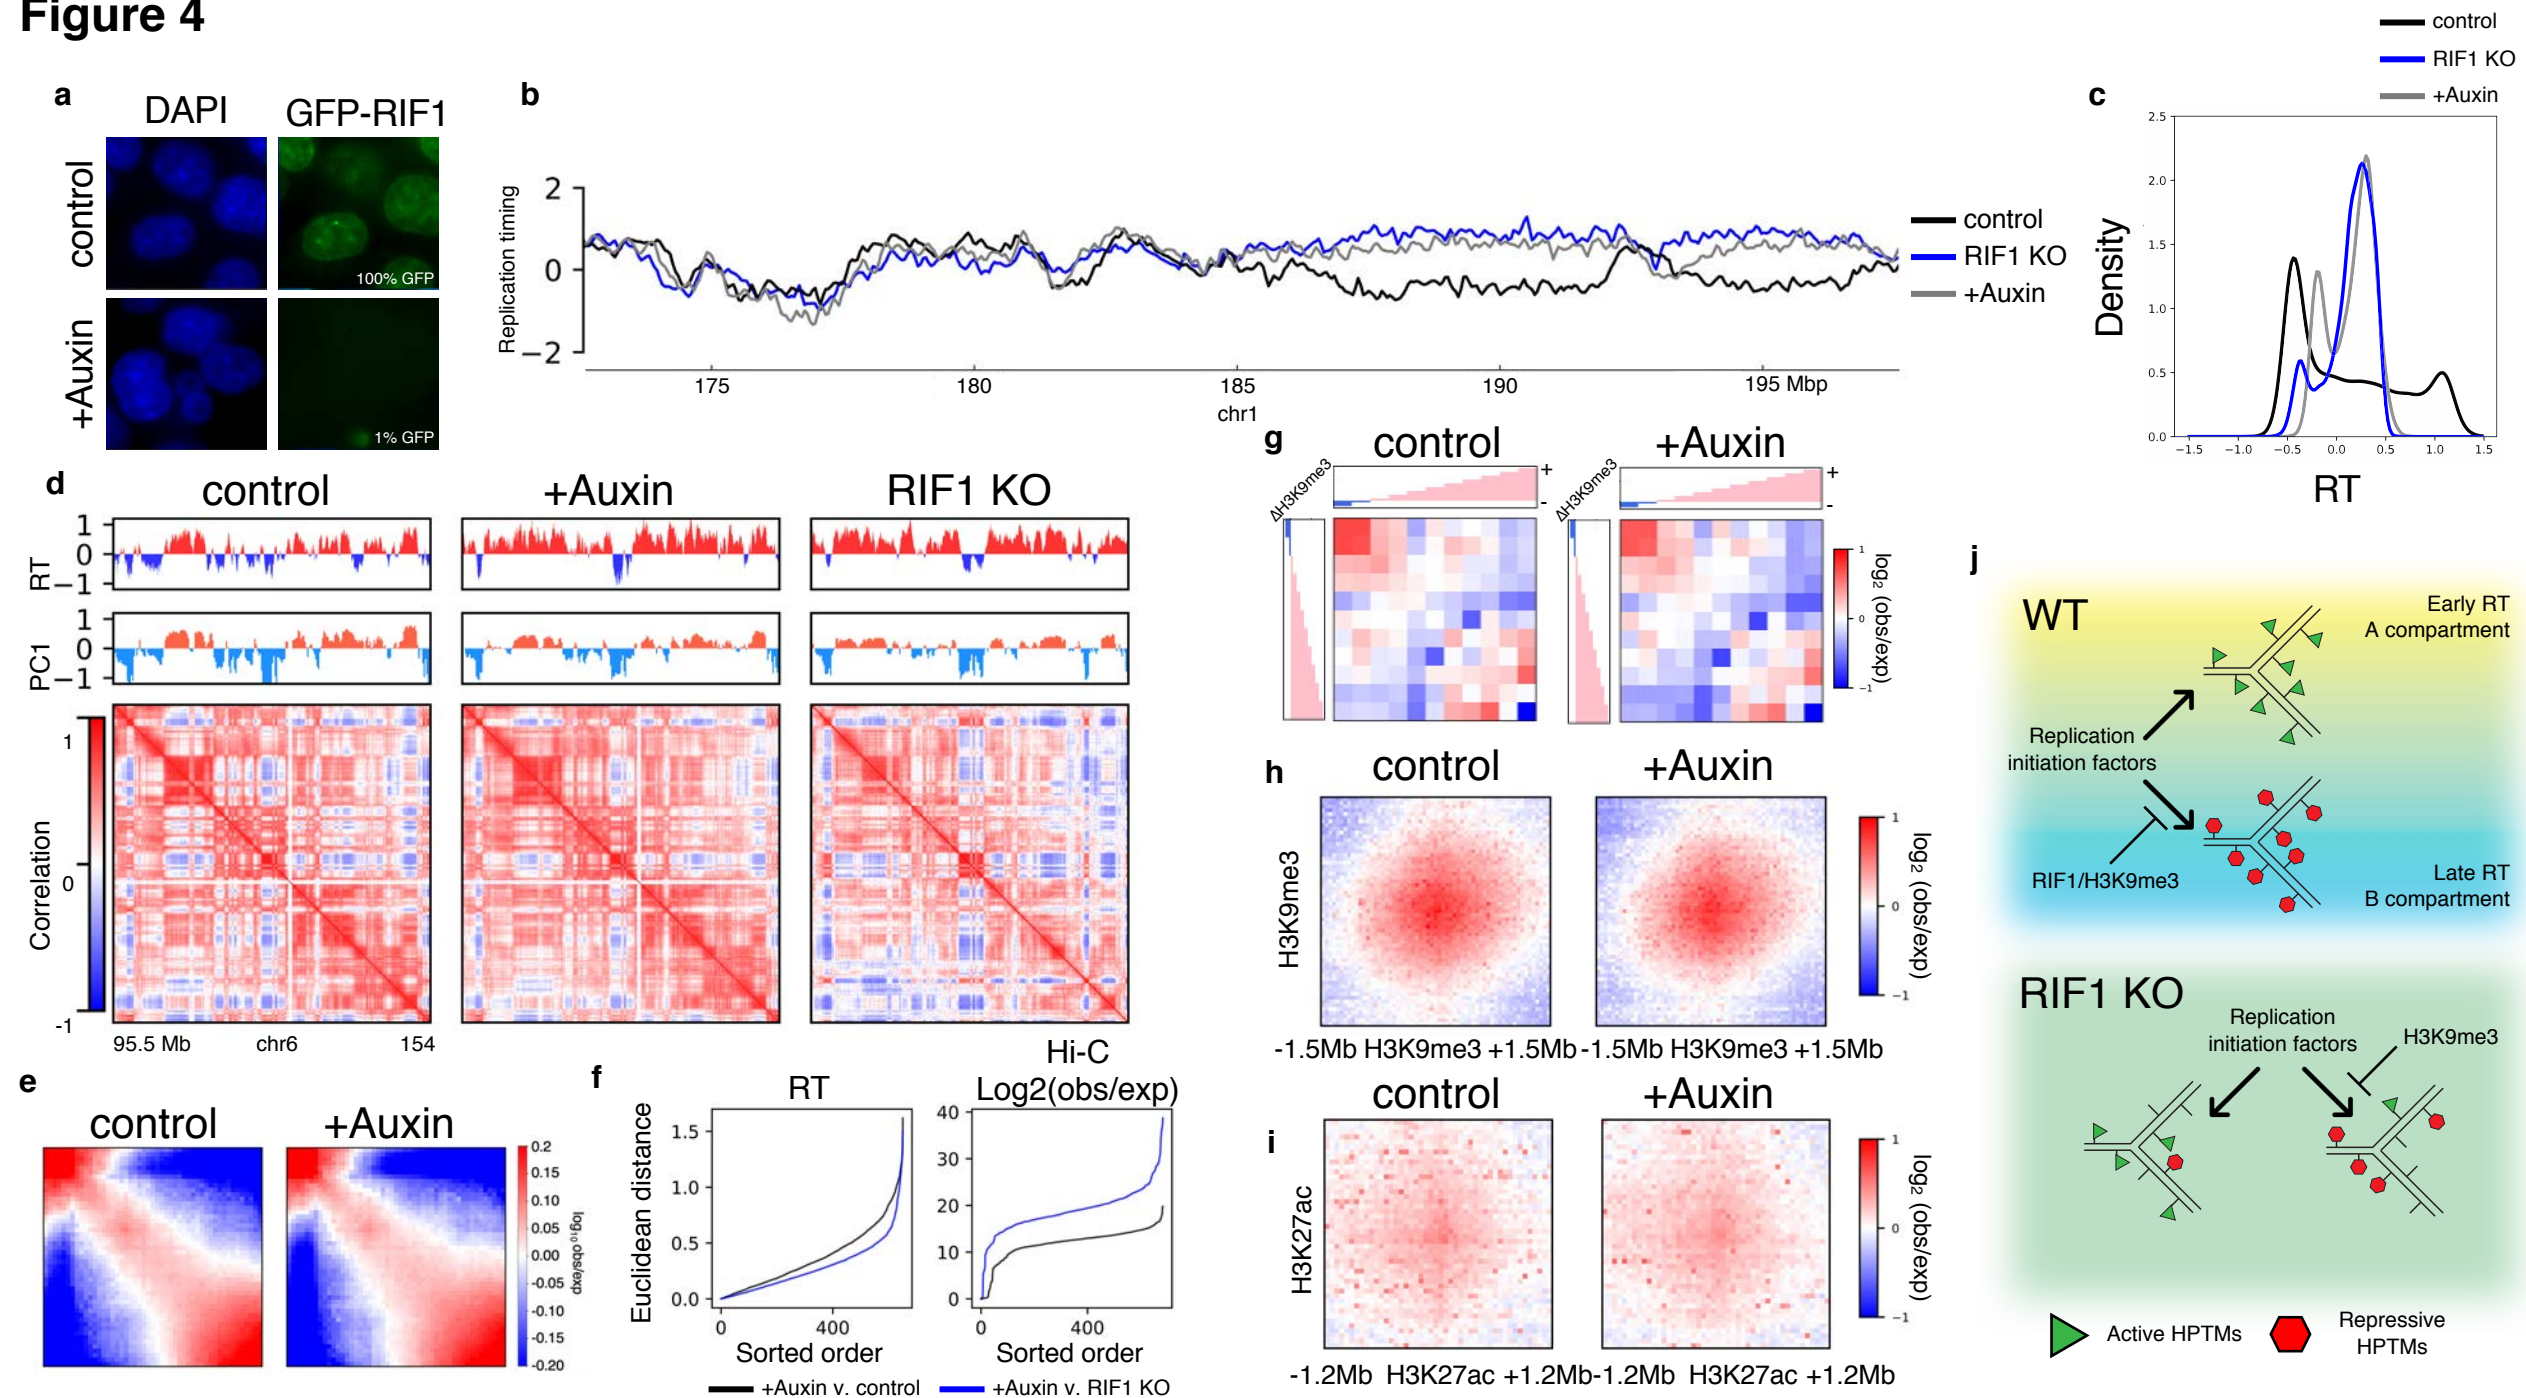

Source: https://www.biorxiv.org/content/10.1101/2019.12.28.890020v1.full.pdf
